# Supplementary material
Source: PubMed Central journal article supplement (PMC3481556)

## Supporting Information

Antibiotic and antimalarial quinones from fungus-growing ant-associated *Pseudonocardia* sp.

Gavin Carr,<sup>†</sup> Emily R. Derbyshire,<sup>†</sup> Eric Caldera,<sup>‡</sup> Cameron R. Currie,<sup>‡</sup> and Jon Clardy,<sup>\*,†</sup>

Department of Biological Chemistry and Molecular Pharmacology, Harvard Medical School,  
Boston, Massachusetts 02115, Department of Bacteriology, University of Wisconsin-Madison,  
Madison, Wisconsin 53706

<sup>†</sup> Harvard Medical School

<sup>‡</sup> University of Wisconsin-Madison

## Index:

Page SI-2: Figure S1, HPLC-MS trace (254 nm) of **1**  
Page SI-3: Figure S2, HPLC-MS trace (254 nm) of **2**  
Page SI-4: Figure S3, HPLC-MS trace (254 nm) of **3**  
Page SI-5: <sup>1</sup>H NMR spectrum of **1** recorded in CD<sub>3</sub>OD at 600 MHz.  
Page SI-6: <sup>13</sup>C NMR spectrum of **1** recorded in CD<sub>3</sub>OD at 150 MHz.  
Page SI-7: COSY spectrum of **1** recorded in CD<sub>3</sub>OD at 600 MHz.  
Page SI-8: HSQC spectrum of **1** recorded in CD<sub>3</sub>OD at 600 MHz.  
Page SI-9: HMBC spectrum of **1** recorded in CD<sub>3</sub>OD at 600 MHz  
Page SI-10: NOESY spectrum of **1** recorded in CD<sub>3</sub>OD at 600 MHz.  
Page SI-11: <sup>1</sup>H NMR spectrum of **2** recorded in CD<sub>3</sub>OD at 600 MHz.  
Page SI-12: COSY spectrum of **2** recorded in CD<sub>3</sub>OD at 600 MHz.  
Page SI-13: HSQC spectrum of **2** recorded in CD<sub>3</sub>OD at 600 MHz.  
Page SI-14: HMBC spectrum of **2** recorded in CD<sub>3</sub>OD at 600 MHz.  
Page SI-15: <sup>1</sup>H NMR spectrum of **3** recorded in CD<sub>3</sub>OD at 600 MHz.  
Page SI-16: COSY spectrum of **3** recorded in CD<sub>3</sub>OD at 600 MHz.  
Page SI-17: HSQC spectrum of **3** recorded in CD<sub>3</sub>OD at 600 MHz.  
Page SI-18: HMBC spectrum of **3** recorded in CD<sub>3</sub>OD at 600 MHz.  
Page SI-19: <sup>1</sup>H NMR spectrum of **4** recorded in CD<sub>3</sub>OD at 600 MHz.  
Page SI-20: <sup>13</sup>C NMR spectrum of **4** recorded in CD<sub>3</sub>OD at 150 MHz.  
Page SI-21: <sup>1</sup>H NMR spectrum of **5** recorded in CD<sub>2</sub>Cl<sub>2</sub> at 600 MHz.  
Page SI-22: <sup>13</sup>C NMR spectrum of **5** recorded in CD<sub>2</sub>Cl<sub>2</sub> at 150 MHz.

SI-2

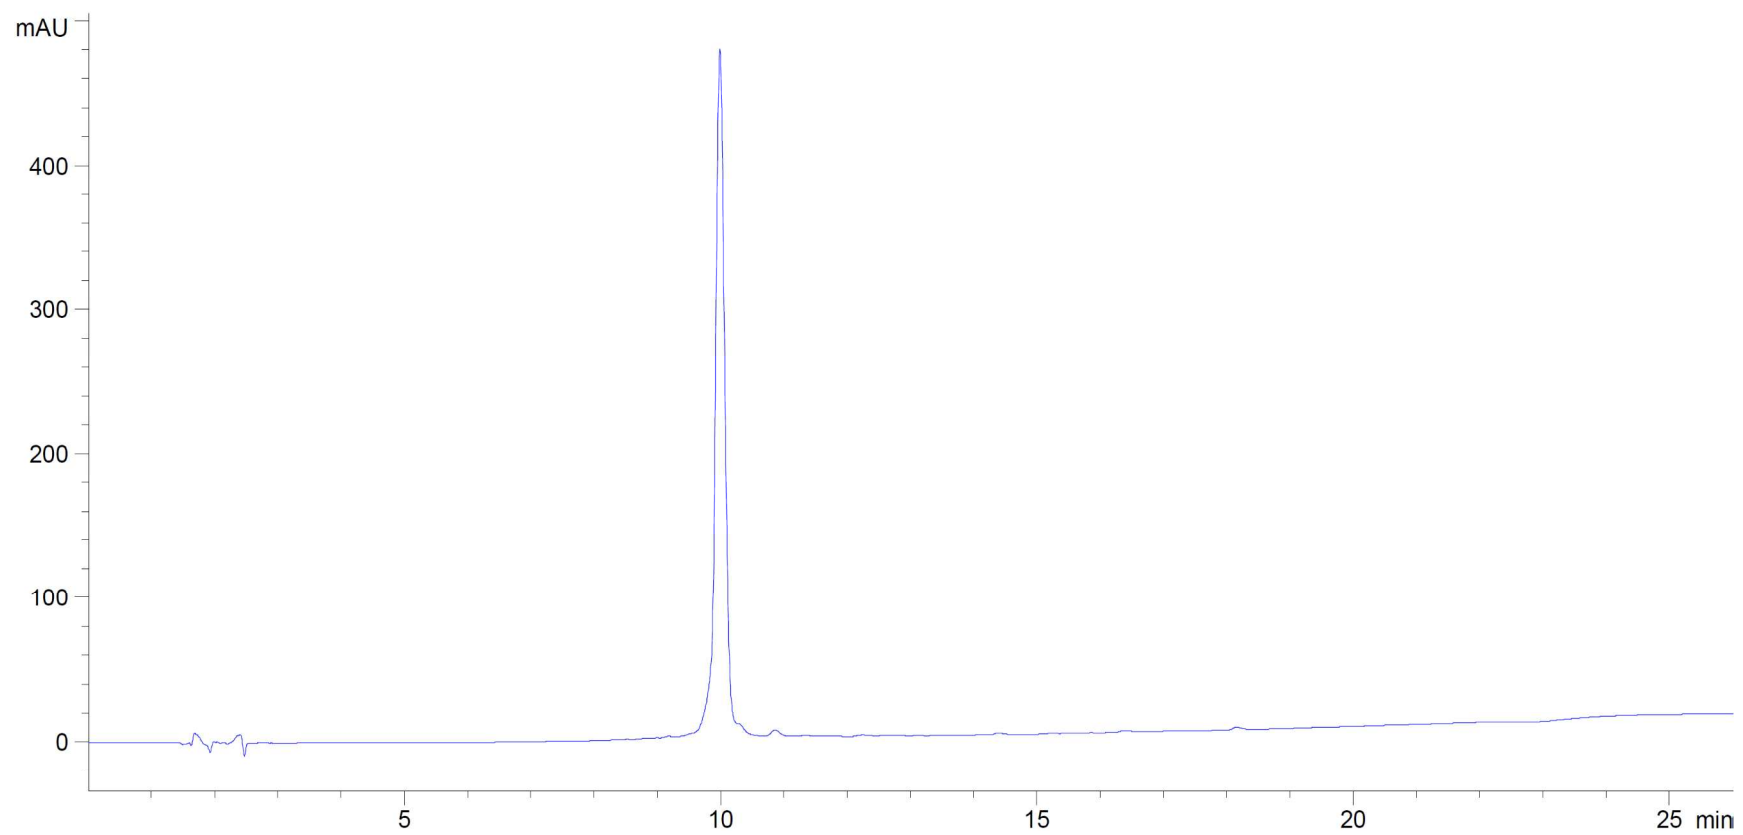

**Figure S1.** HPLC-MS trace (254 nm) of **1**.

SI-3

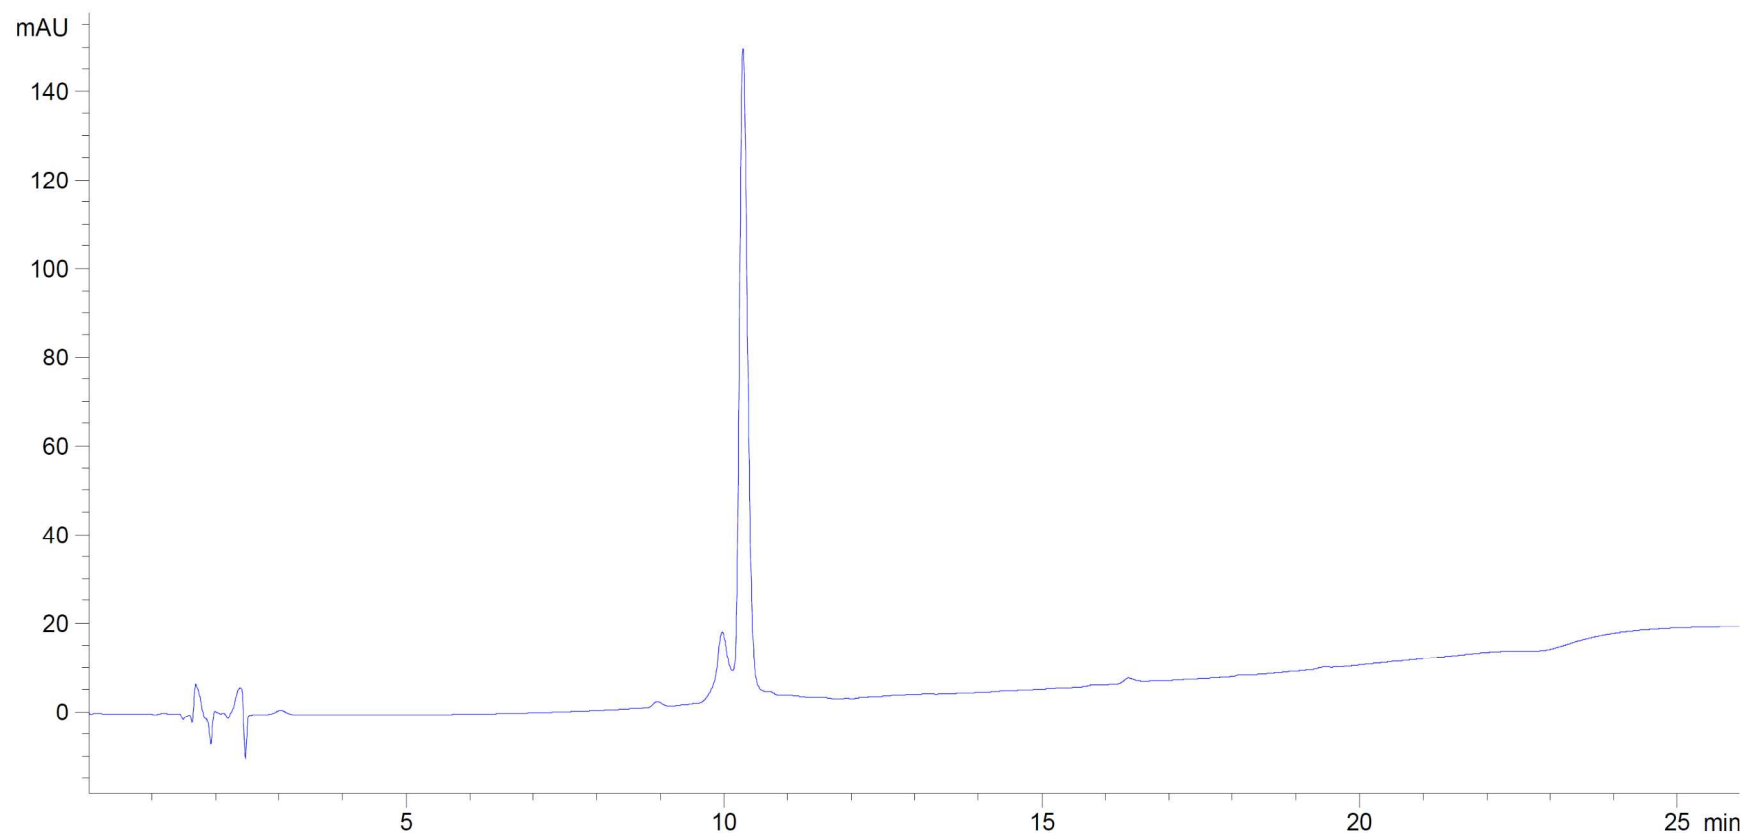

**Figure S2.** HPLC-MS trace (254 nm) of **2**.

SI-4

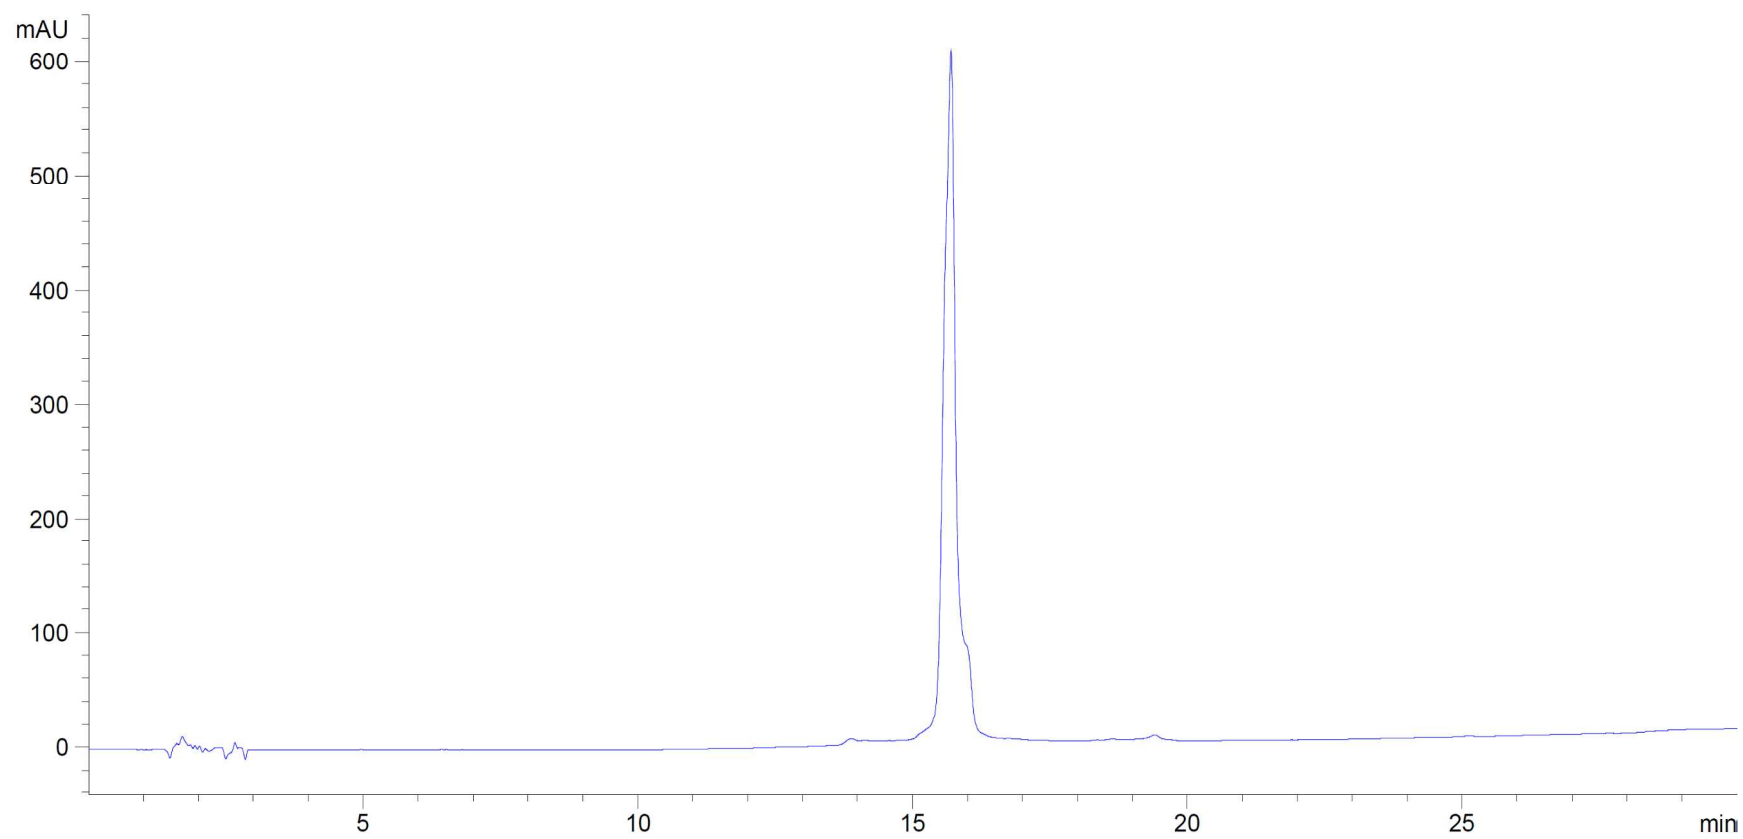

**Figure S3.** HPLC-MS trace (254 nm) of **3**.

SI-5

$^1\text{H}$  NMR spectrum of **1** recorded in  $\text{CD}_3\text{OD}$  at 600 MHz

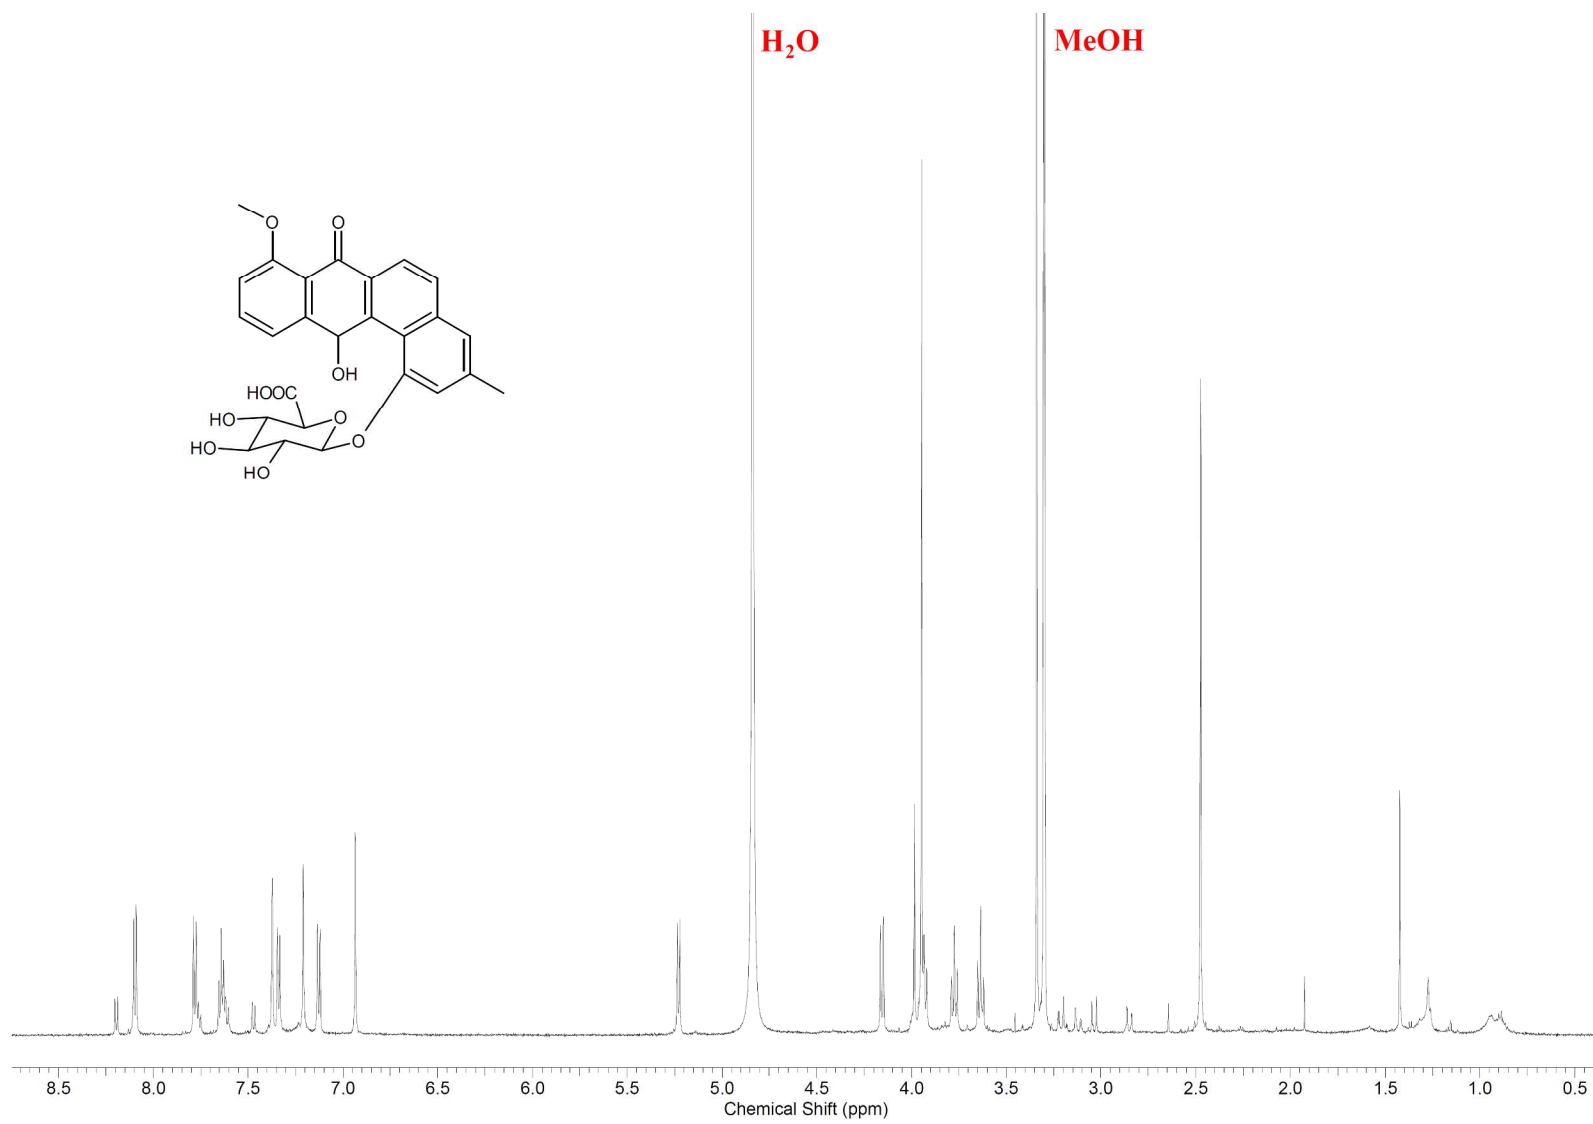

SI-6

$^{13}\text{C}$  NMR spectrum of **1** recorded in  $\text{CD}_3\text{OD}$  at 150 MHz

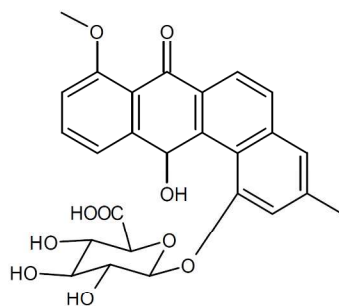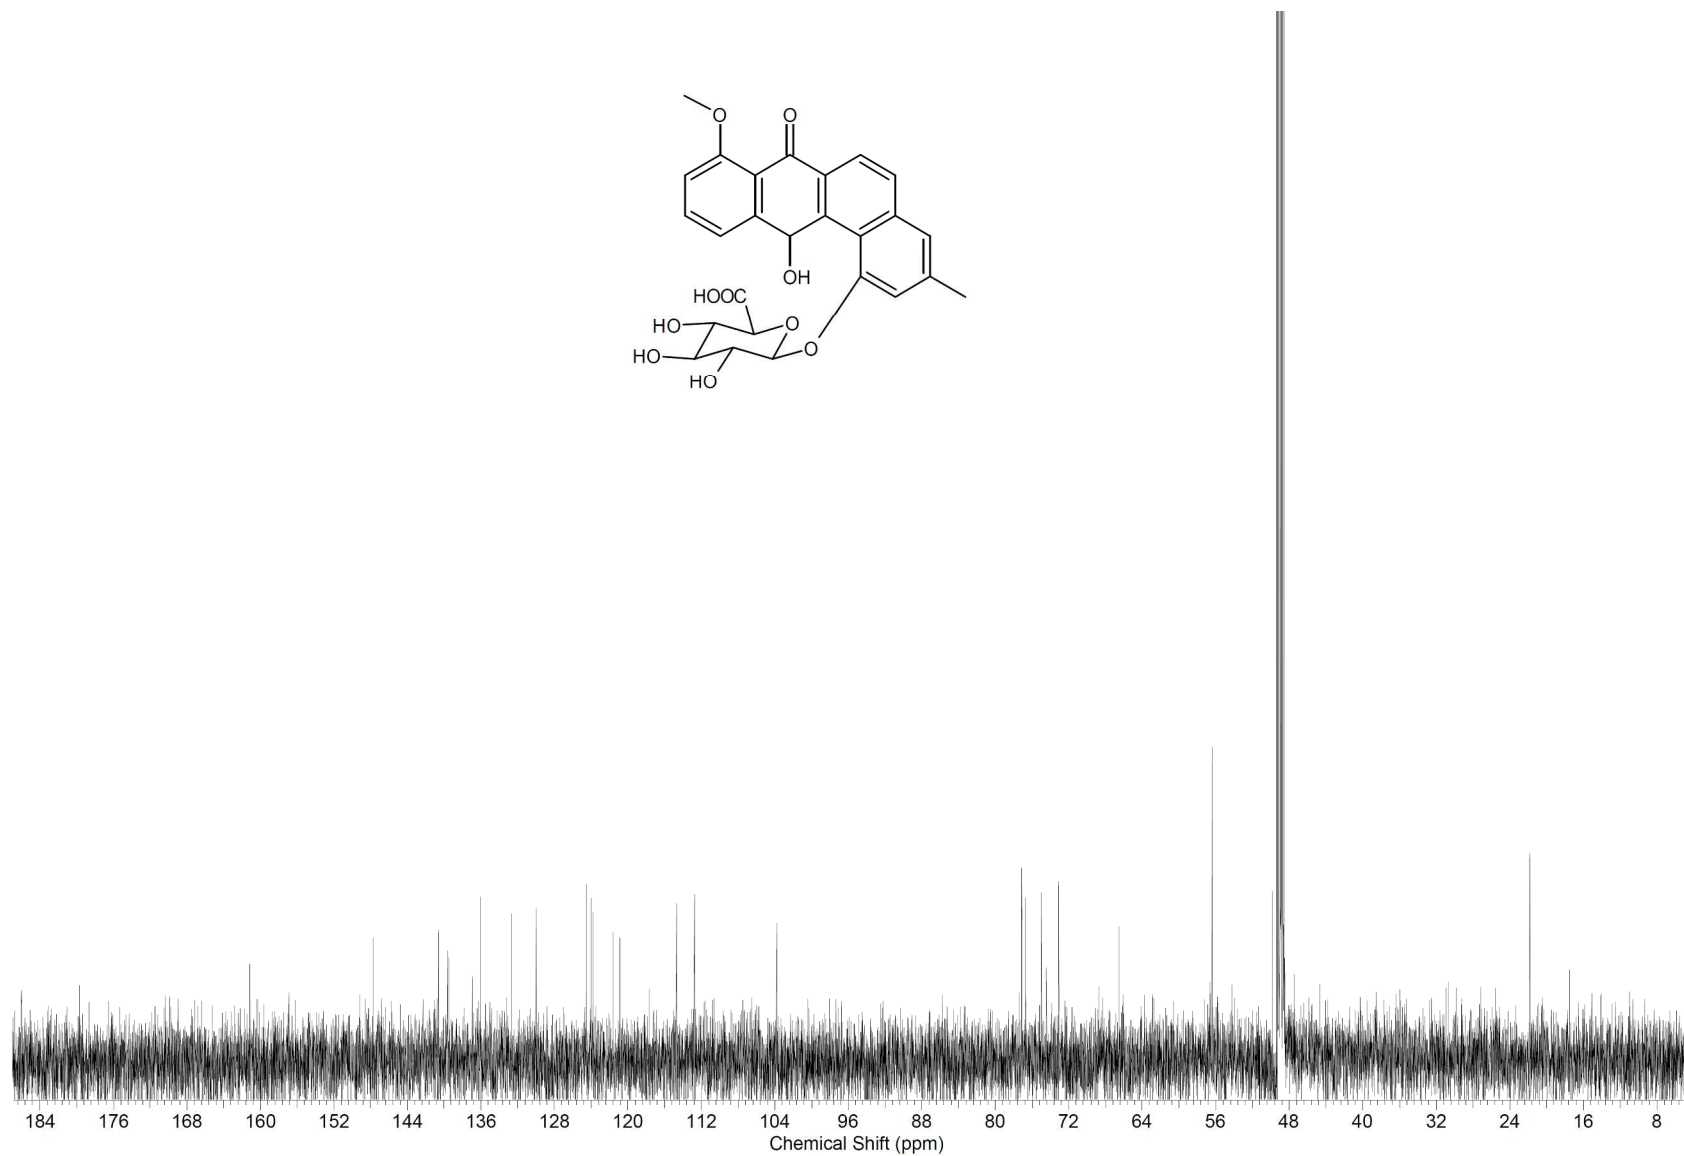

SI-7

COSY spectrum of **1** recorded in CD<sub>3</sub>OD at 600 MHz

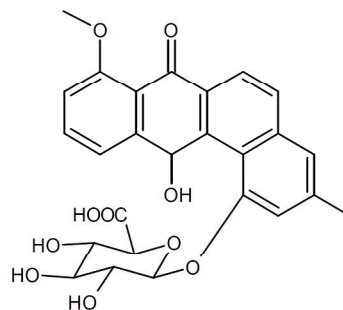

C21-EC1-MeOH-C18-30-60M-p1-496-2D\_20110808\_gCOSY\_001.fid.esp

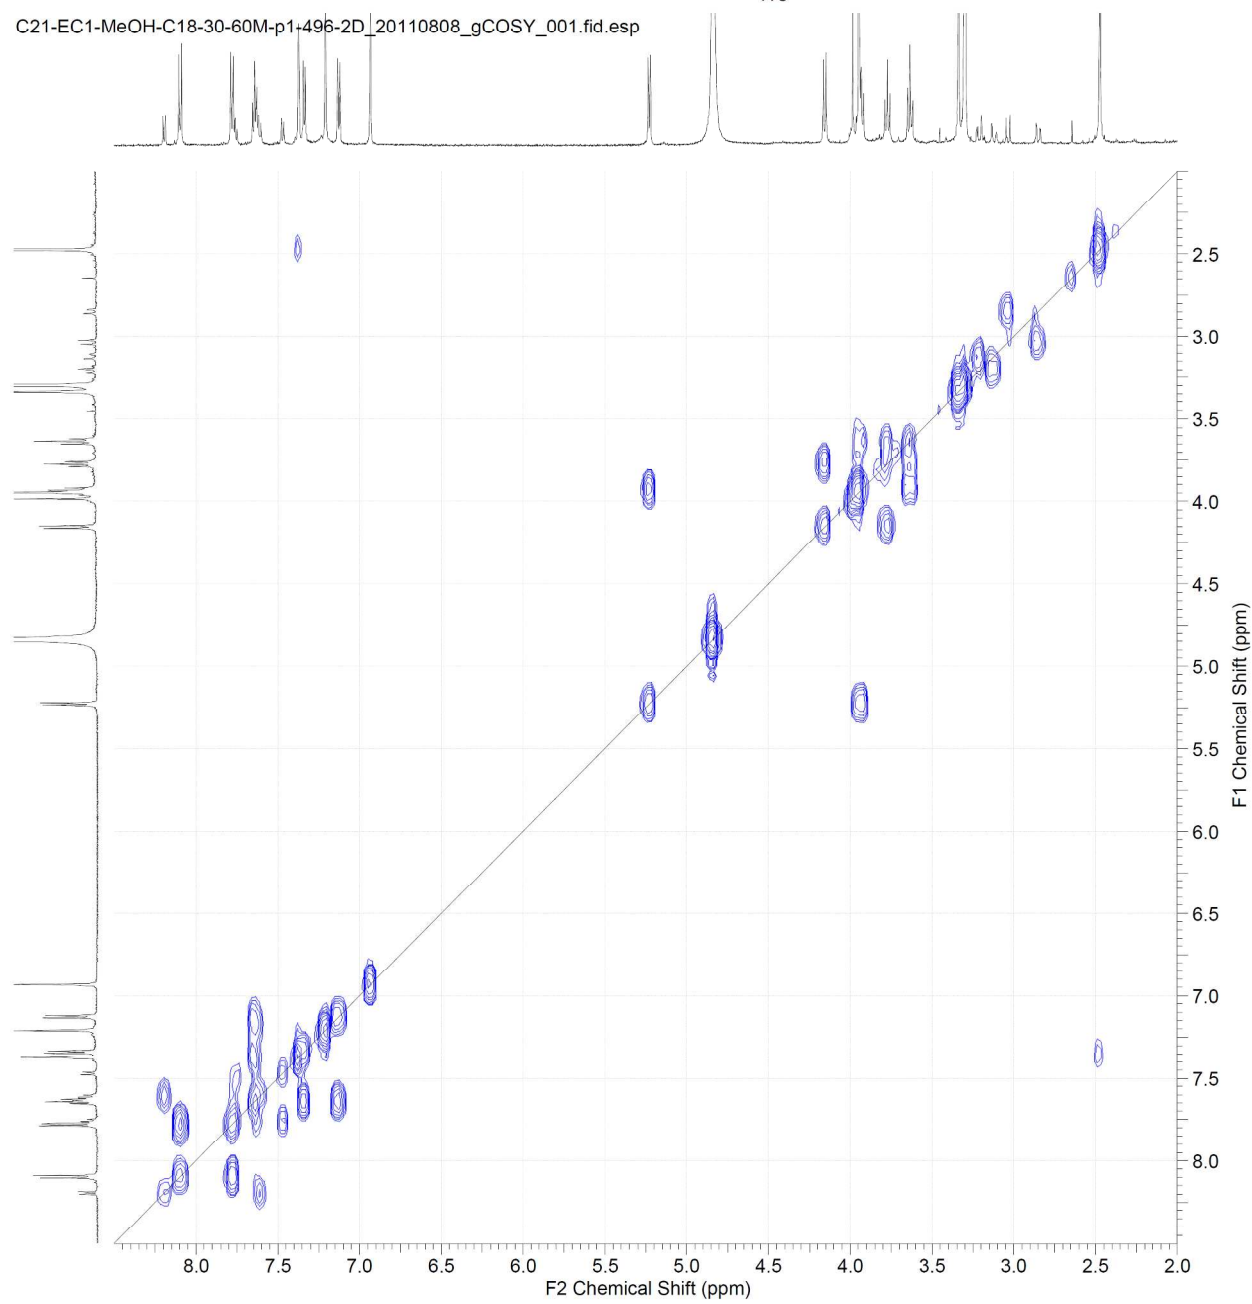

SI-8

HSQC spectrum of **1** recorded in CD<sub>3</sub>OD at 600 MHz

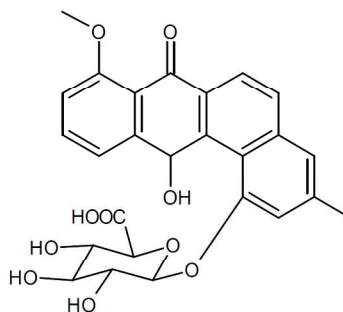

C21-EC1-MeOH-C18-30-60M-p1-496-2D\_20110808\_gHSQCAD\_001.fid.esp

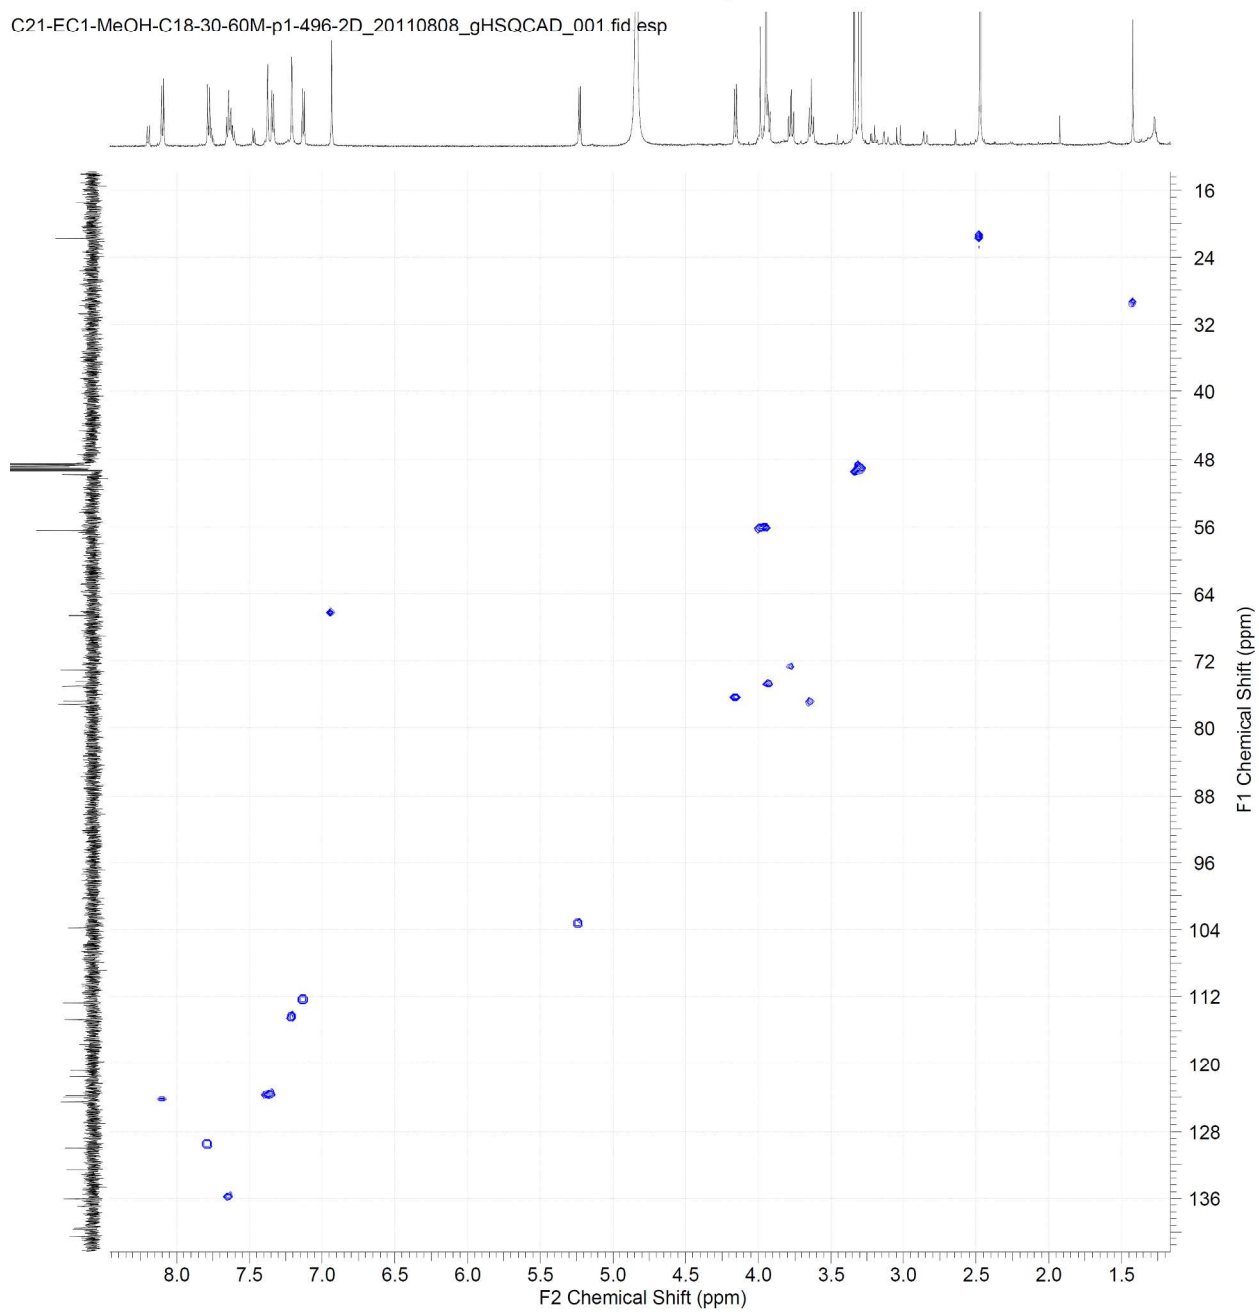



SI-9

HMBC spectrum of **1** recorded in CD<sub>3</sub>OD at 600 MHz

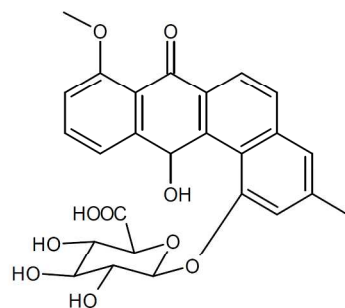

C21-EC1-MeOH-C18-30-60M-p1-496-2D\_20110807\_gHMBCAD\_001.fid.esp

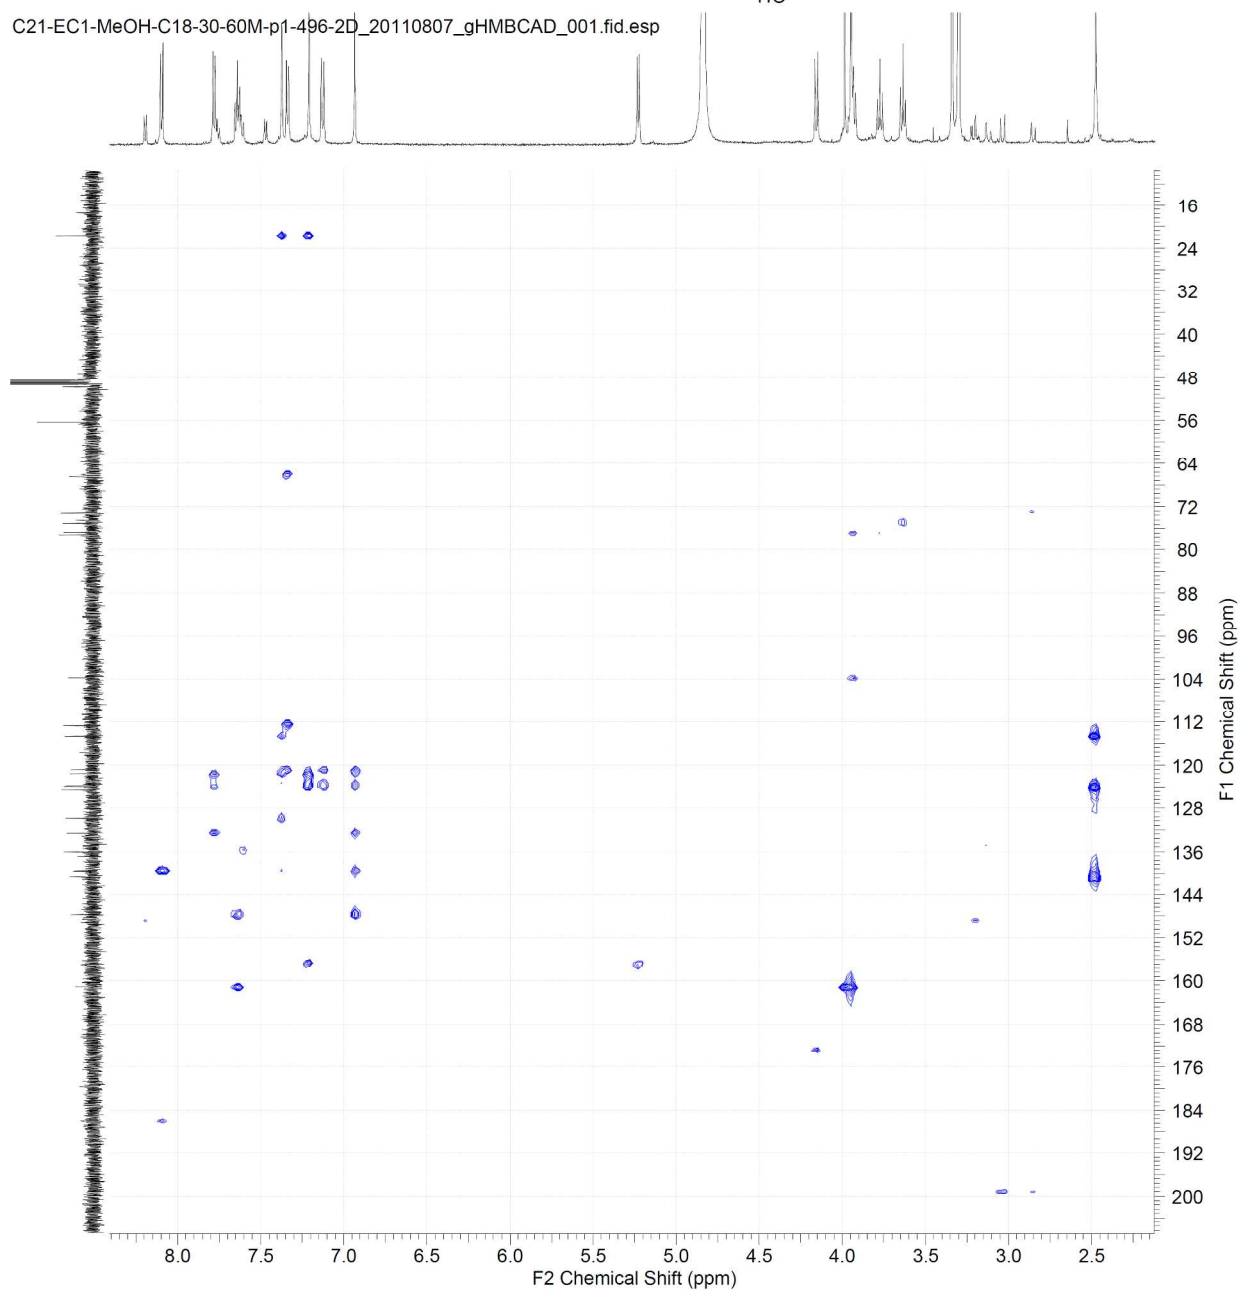

SI-10

NOESY spectrum of **1** recorded in CD<sub>3</sub>OD at 600 MHz

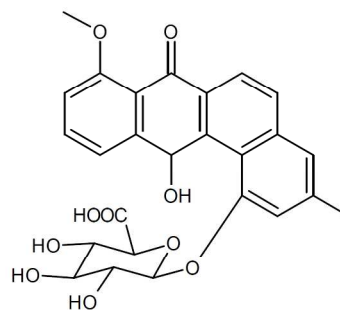

C21-EC1-MeOH-C18-30-60M-p1-496-2D\_20110808\_NOESY\_001.fid.esp

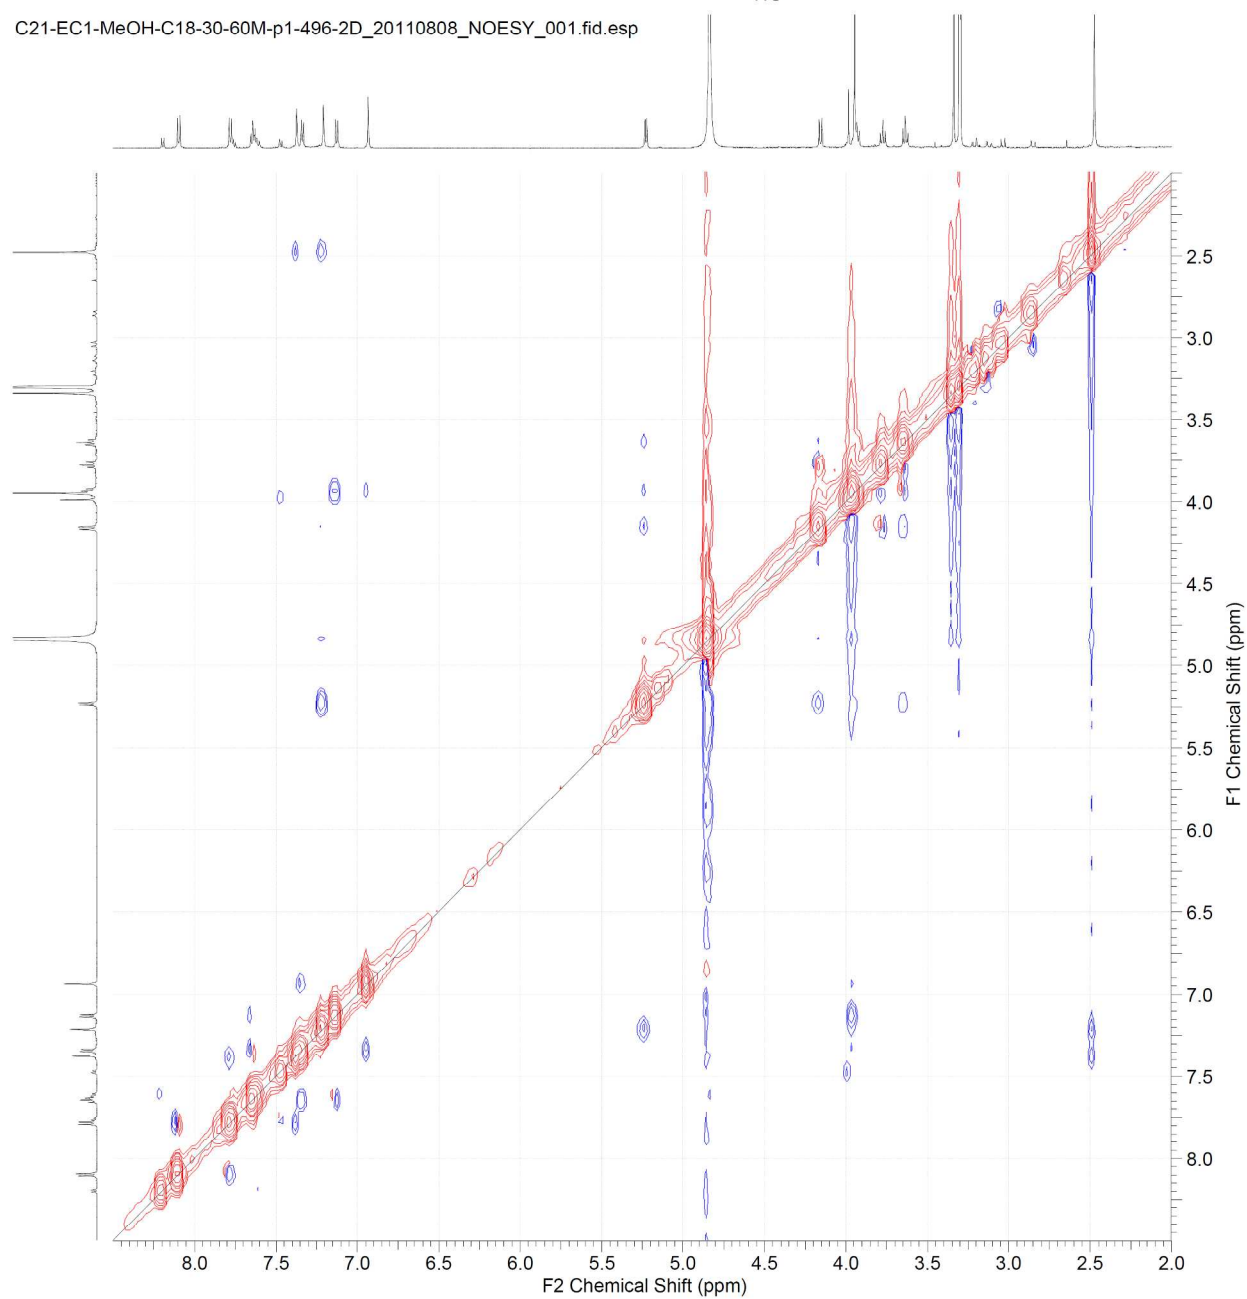

SI-11

$^1\text{H}$  NMR spectrum of **2** recorded in  $\text{CD}_3\text{OD}$  at 600 MHz

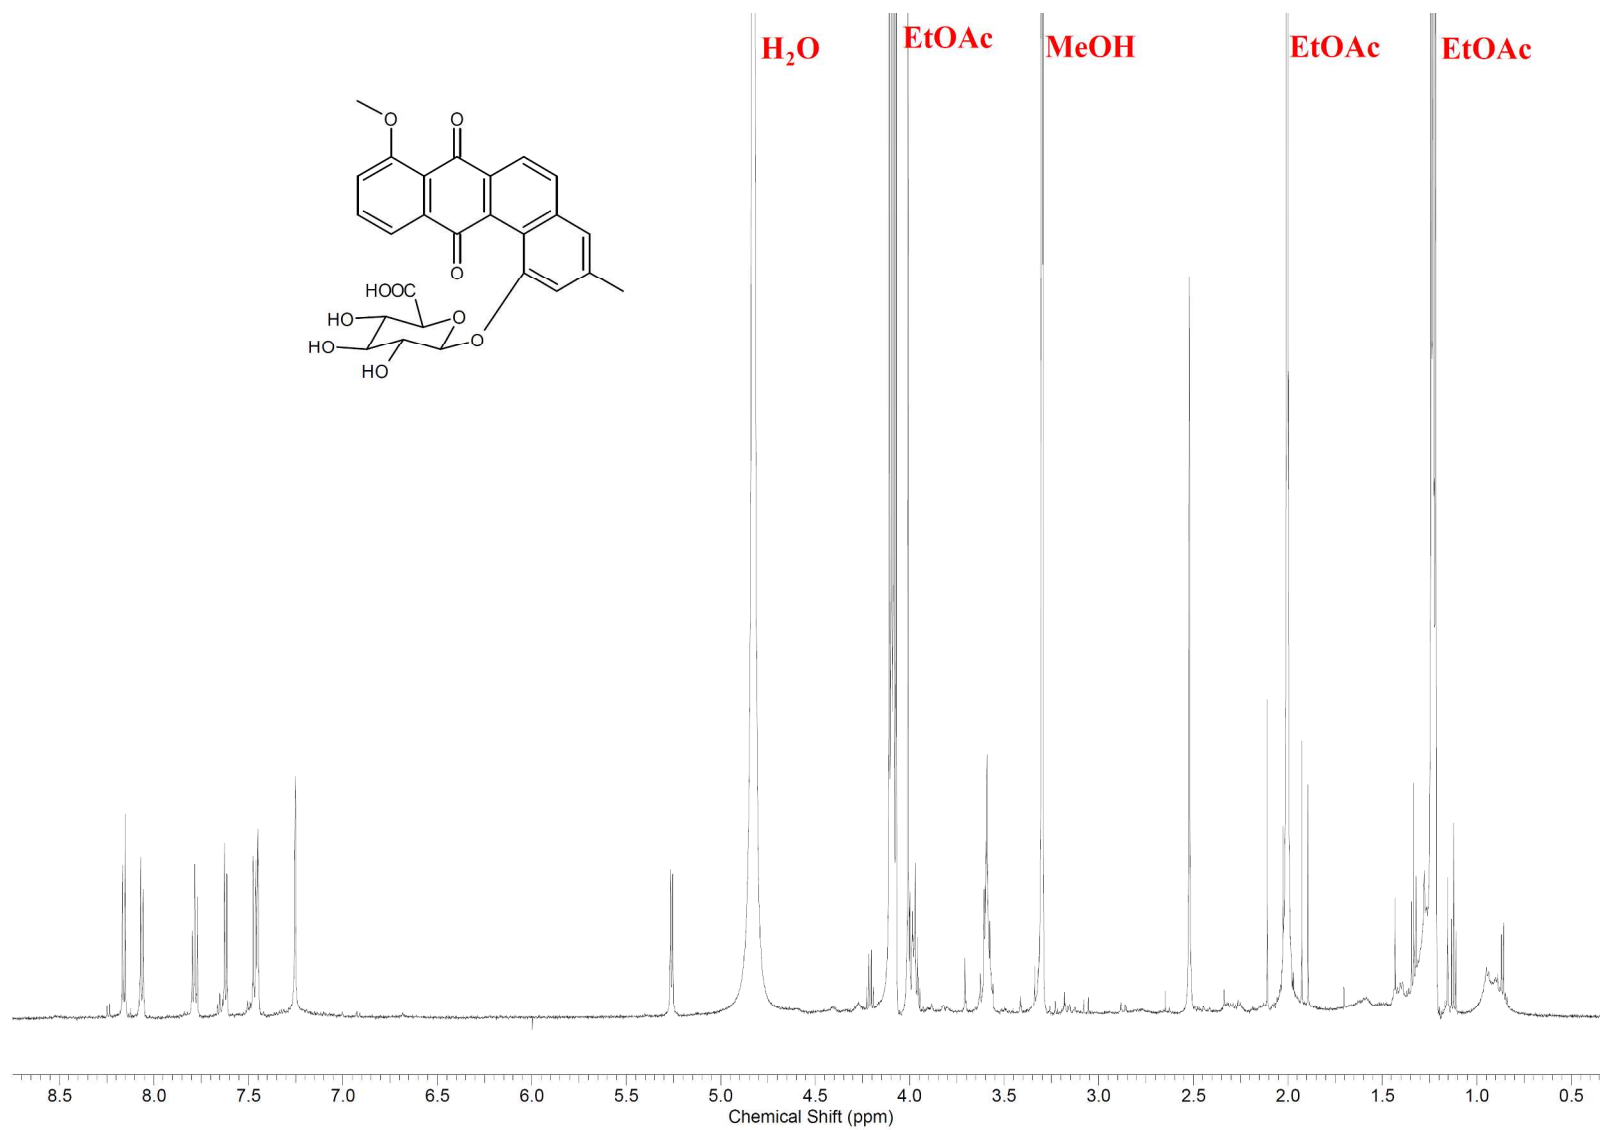

SI-12

COSY spectrum of **2** recorded in CD<sub>3</sub>OD at 600 MHz

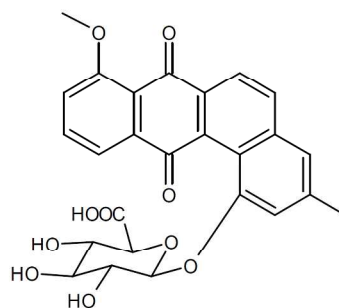

C21-EC1-MeOH-C18-30-60M-p2-2D\_20110804\_gCOSY\_001.fid.esp

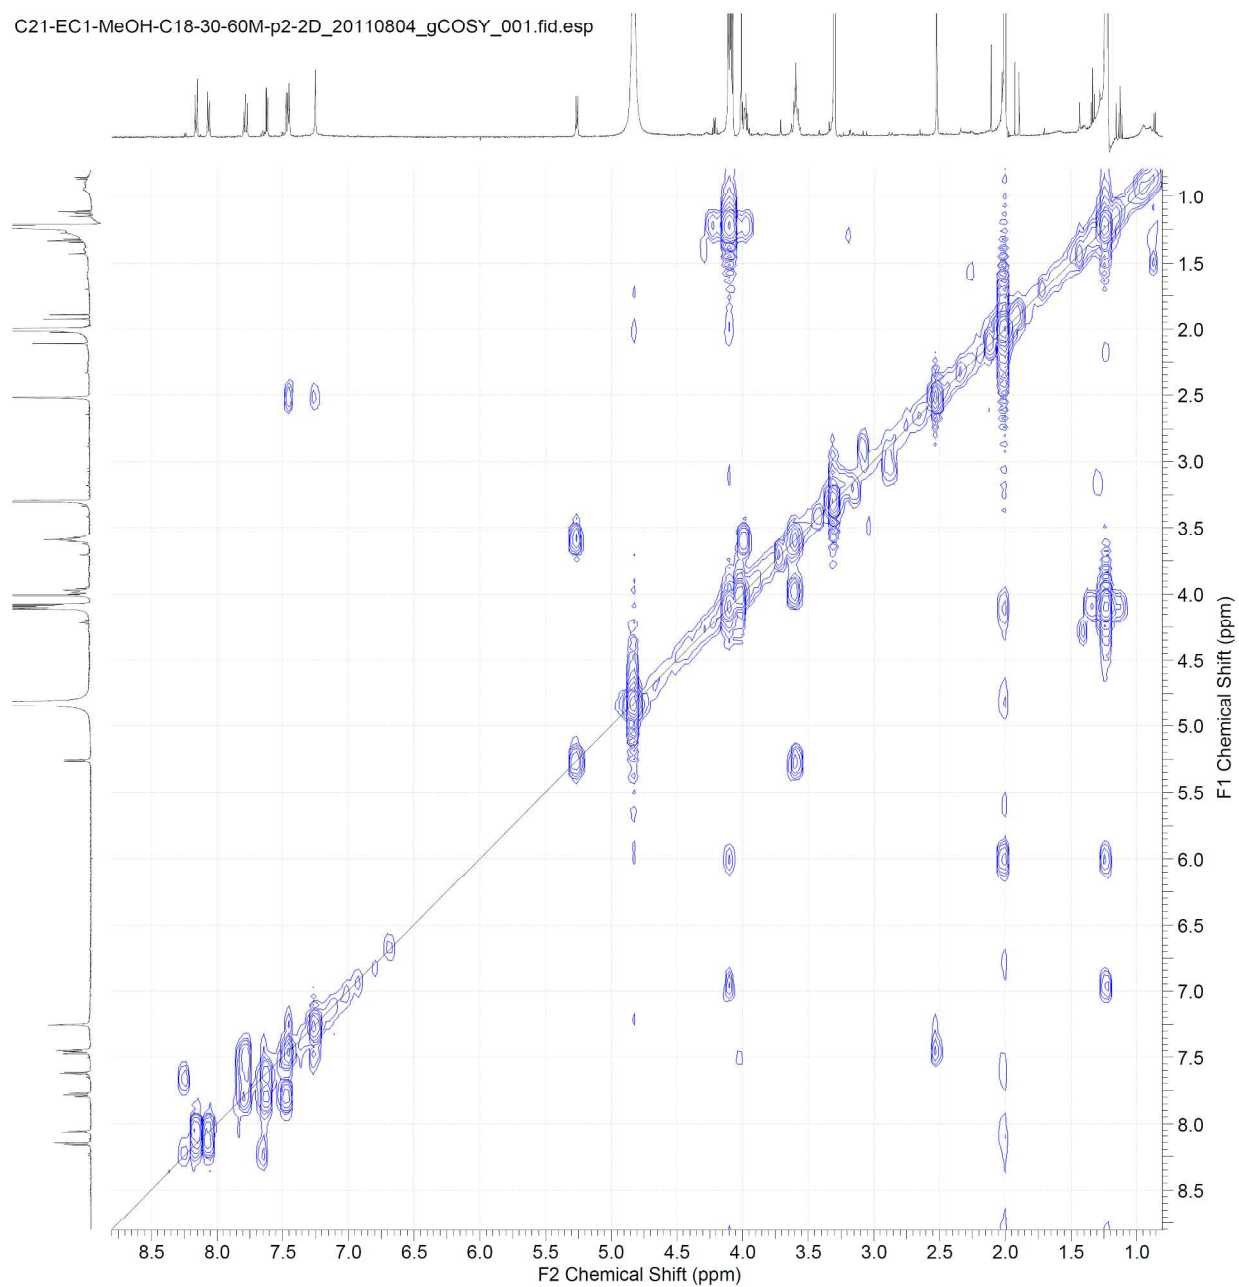

SI-13

HSQC spectrum of **2** recorded in CD<sub>3</sub>OD at 600 MHz

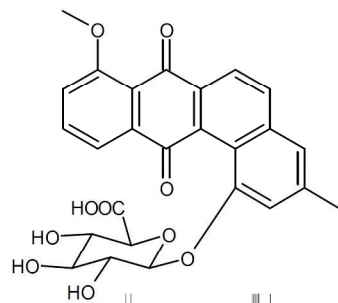

C21-EC1-MeOH-C18-30-60M-p2-2D\_20110804\_gHSQCAD\_001.fid.esp

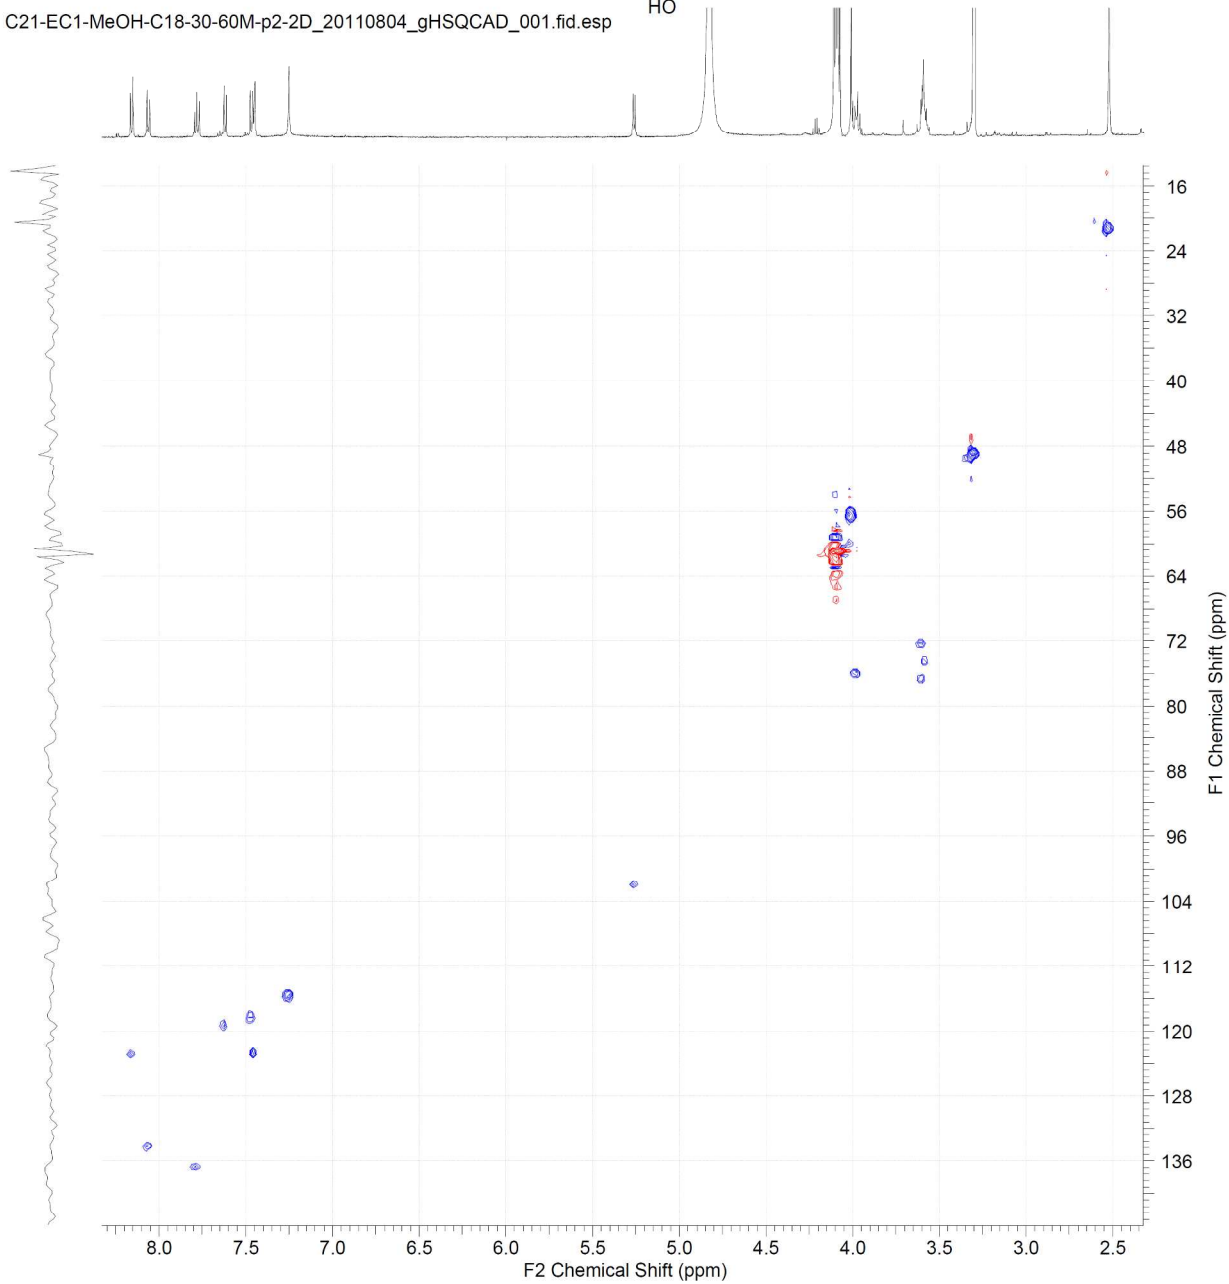

SI-14

HMBC spectrum of **2** recorded in CD<sub>3</sub>OD at 600 MHz

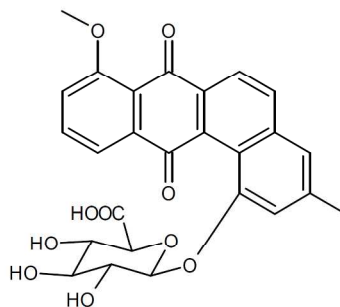

C21-EC1-MeOH-C18-30-60M-p2-2D\_20110804\_gHMBCAD\_001.fid.esp

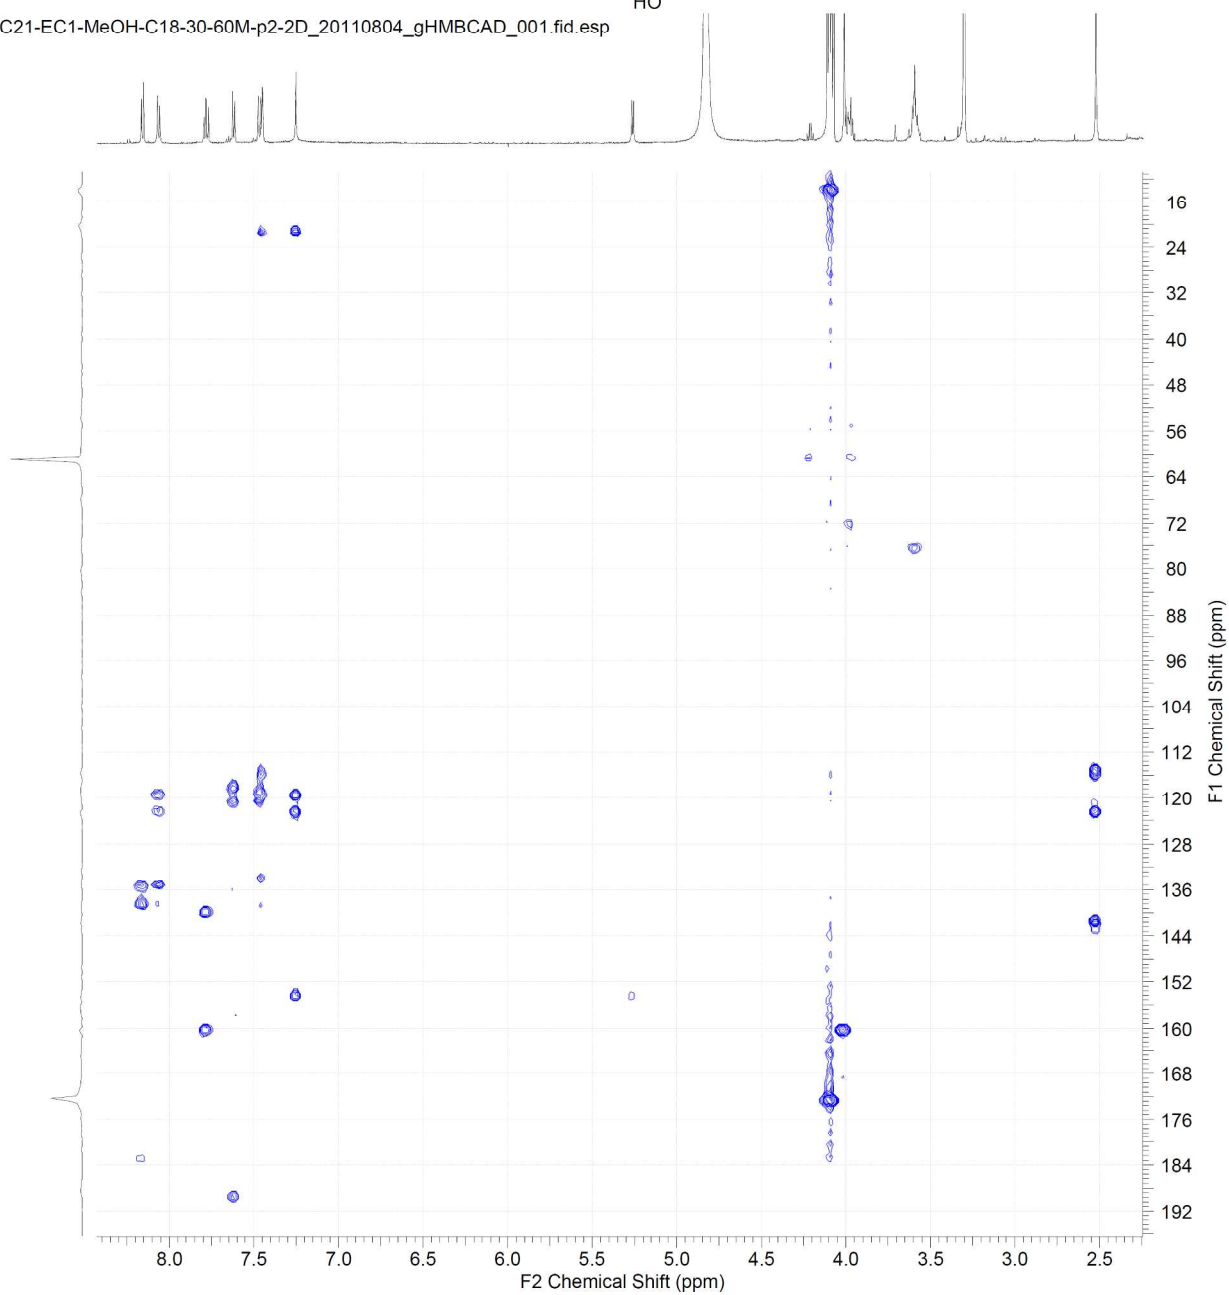

SI-15

$^1\text{H}$  NMR spectrum of **3** recorded in  $\text{CD}_3\text{OD}$  at 600 MHz

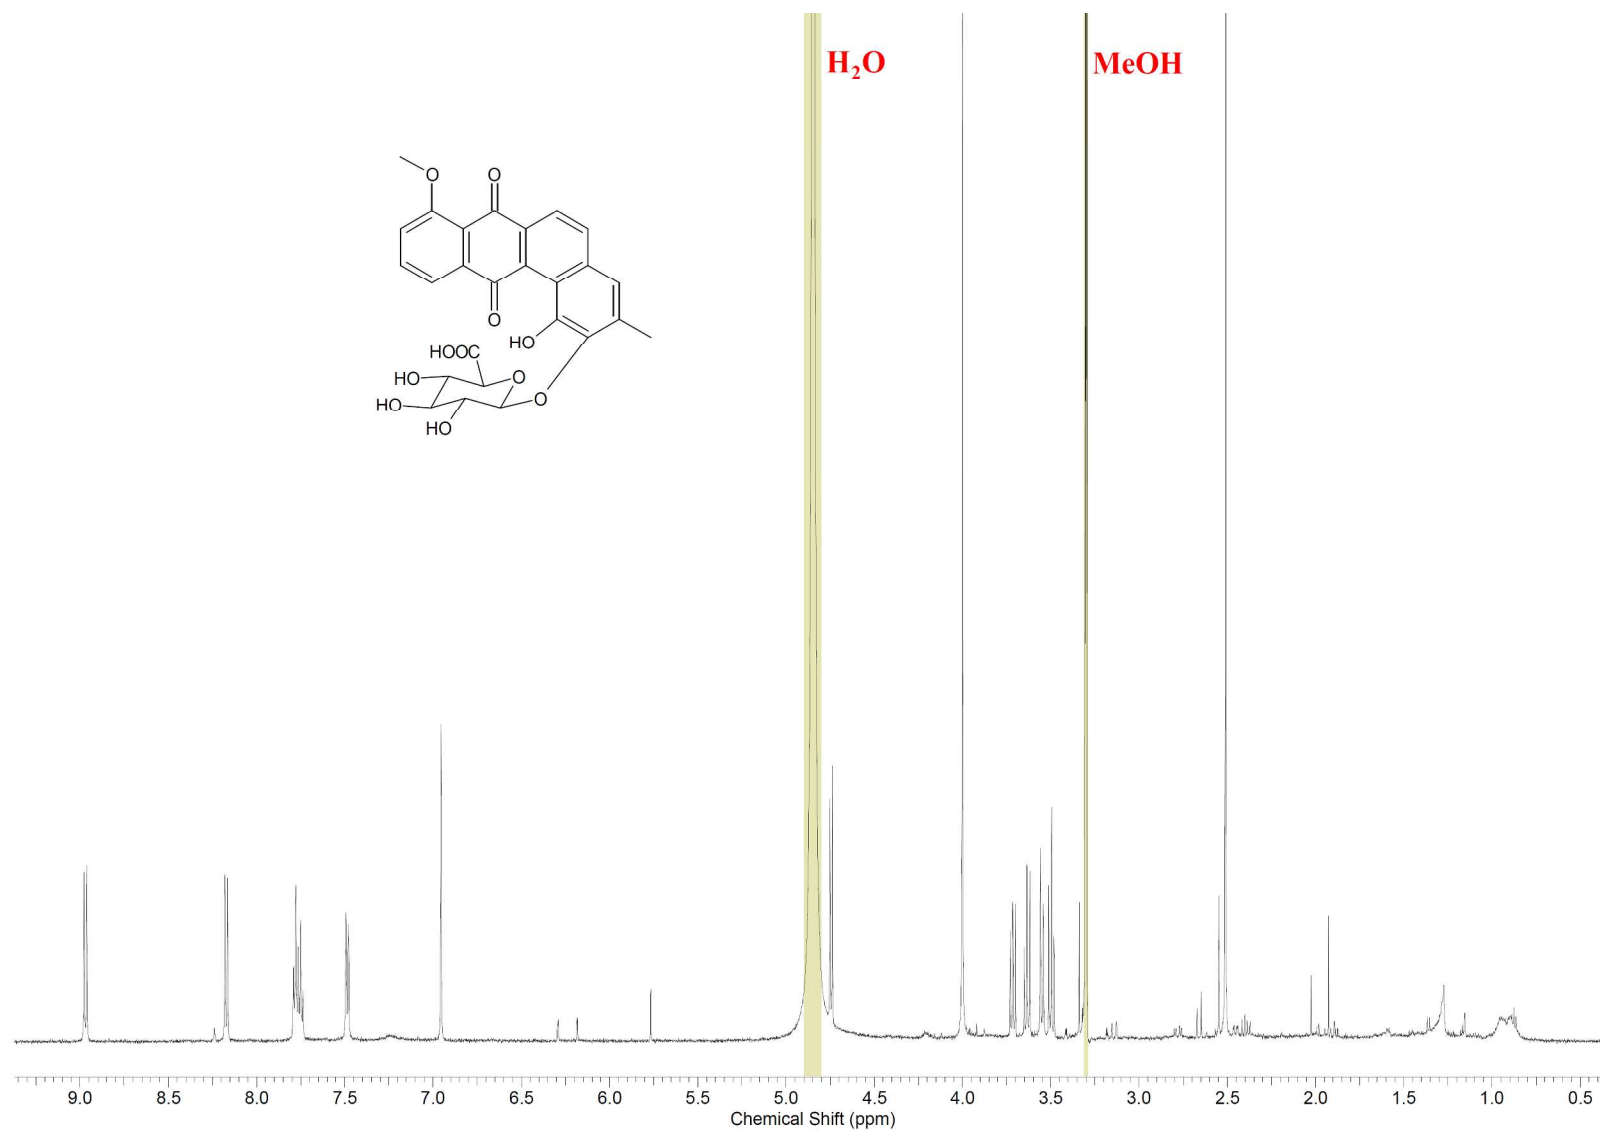

SI-16

COSY spectrum of **3** recorded in CD<sub>3</sub>OD at 600 MHz

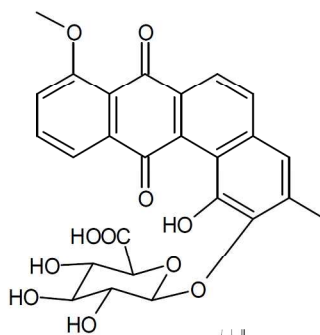

C25-EC1-386-2D\_20120120\_gCOSY\_001.fid.esp

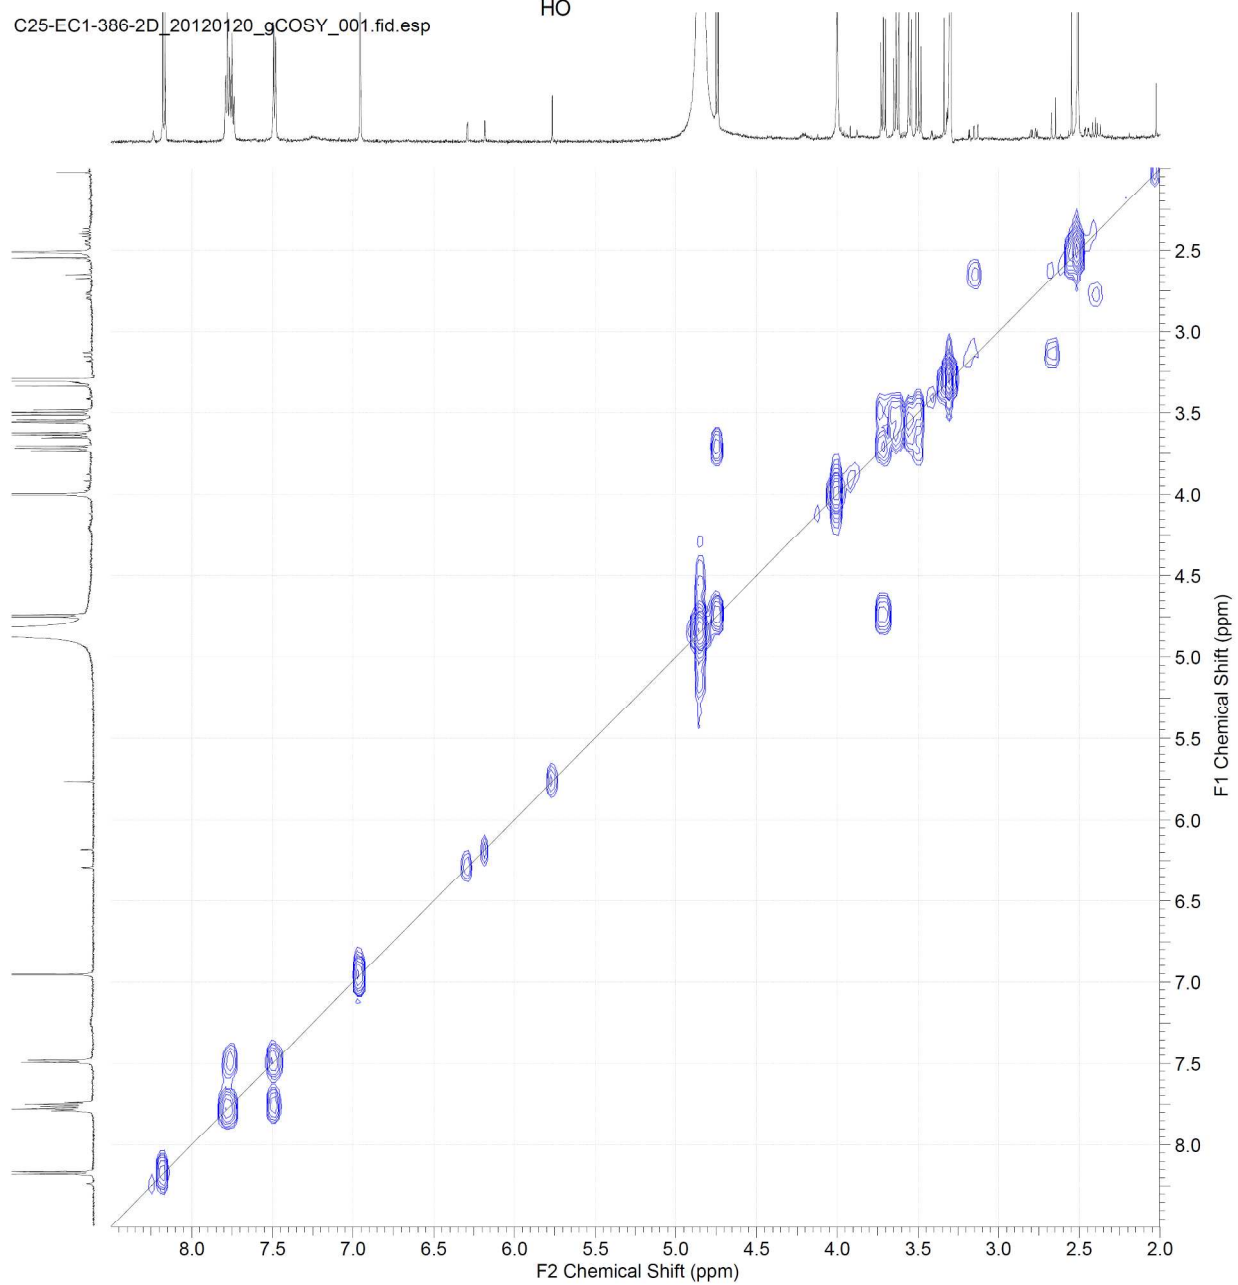



SI-17

HSQC spectrum of **3** recorded in CD<sub>3</sub>OD at 600 MHz

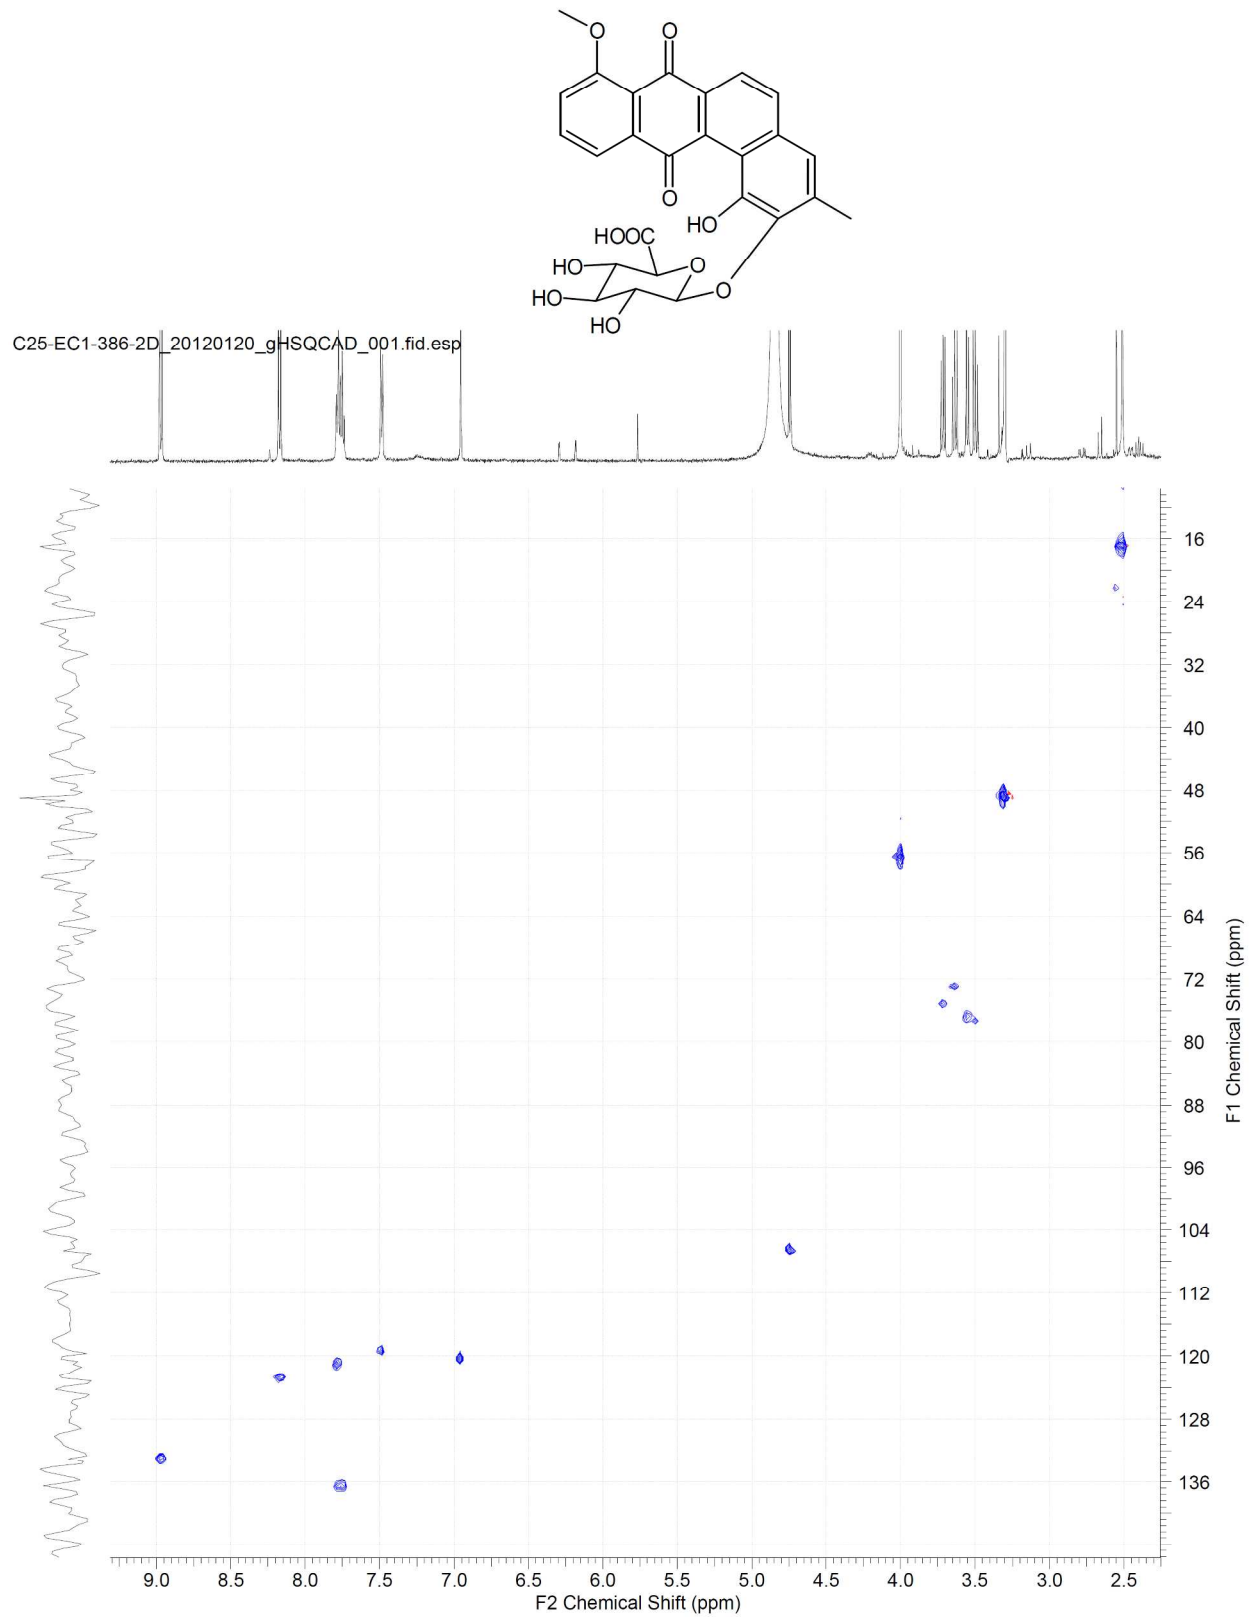

SI-18

HMBC spectrum of **3** recorded in CD<sub>3</sub>OD at 600 MHz

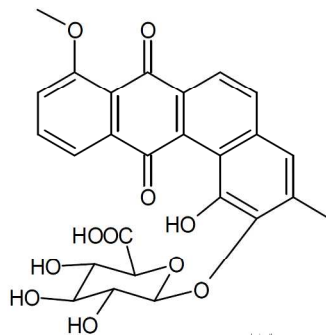

C25-EC1-386-2D\_20120120\_gHMBCAD\_001.fid.esp

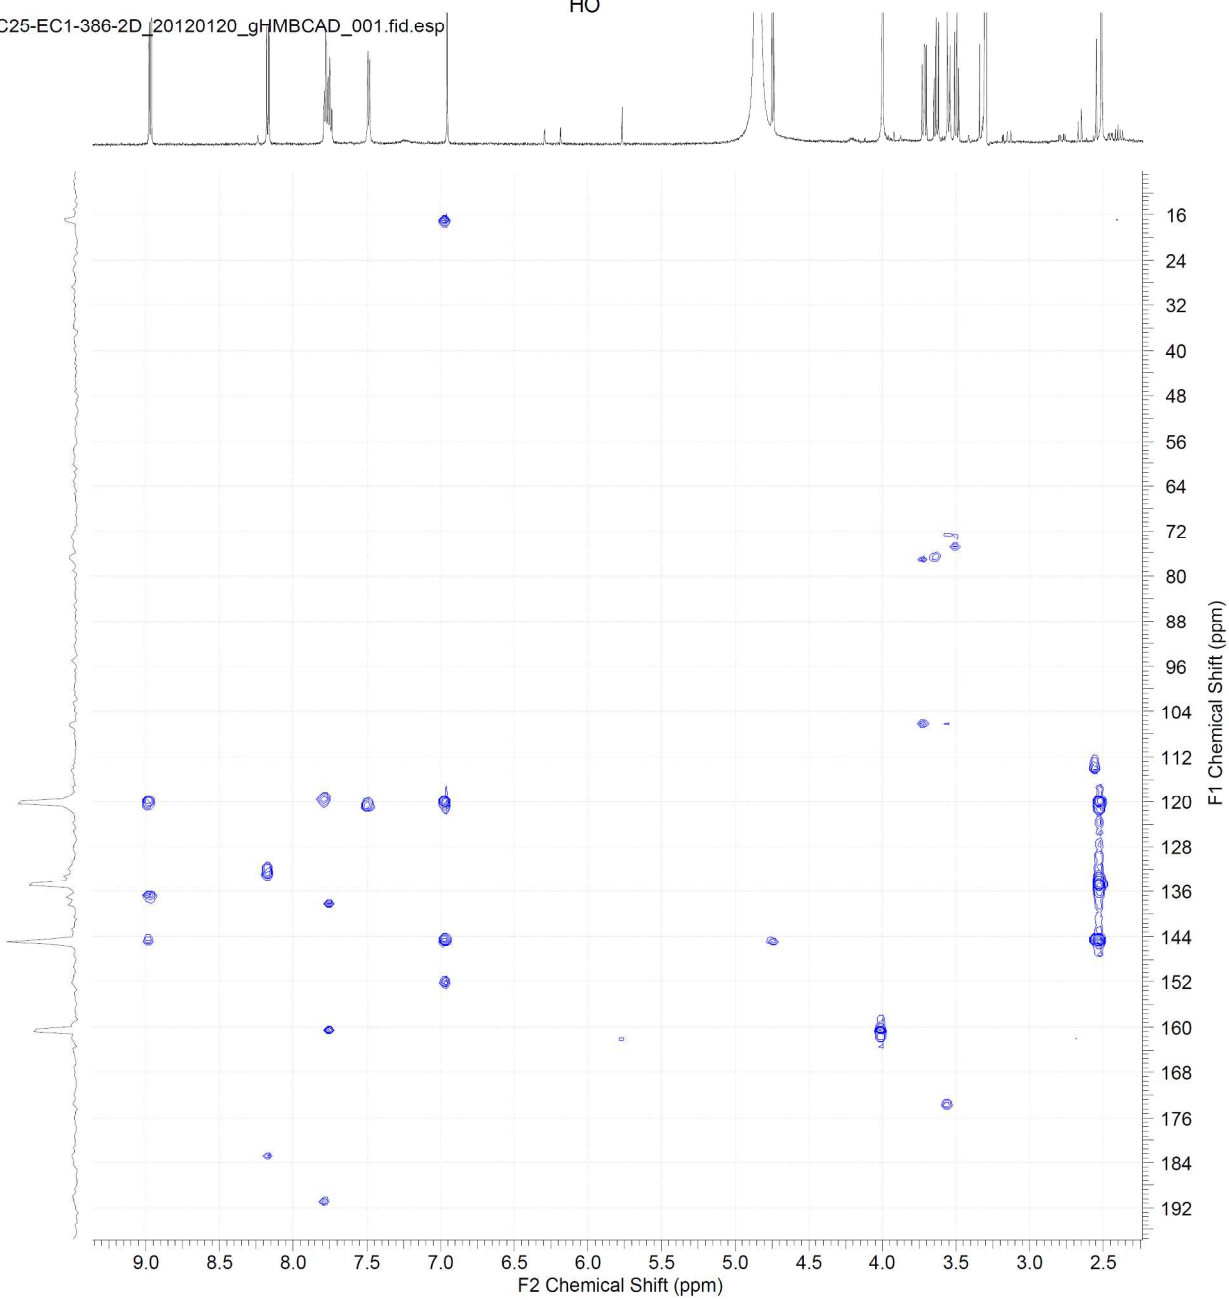

SI-19

$^1\text{H}$  NMR spectrum of **4** recorded in  $\text{CD}_3\text{OD}$  at 600 MHz

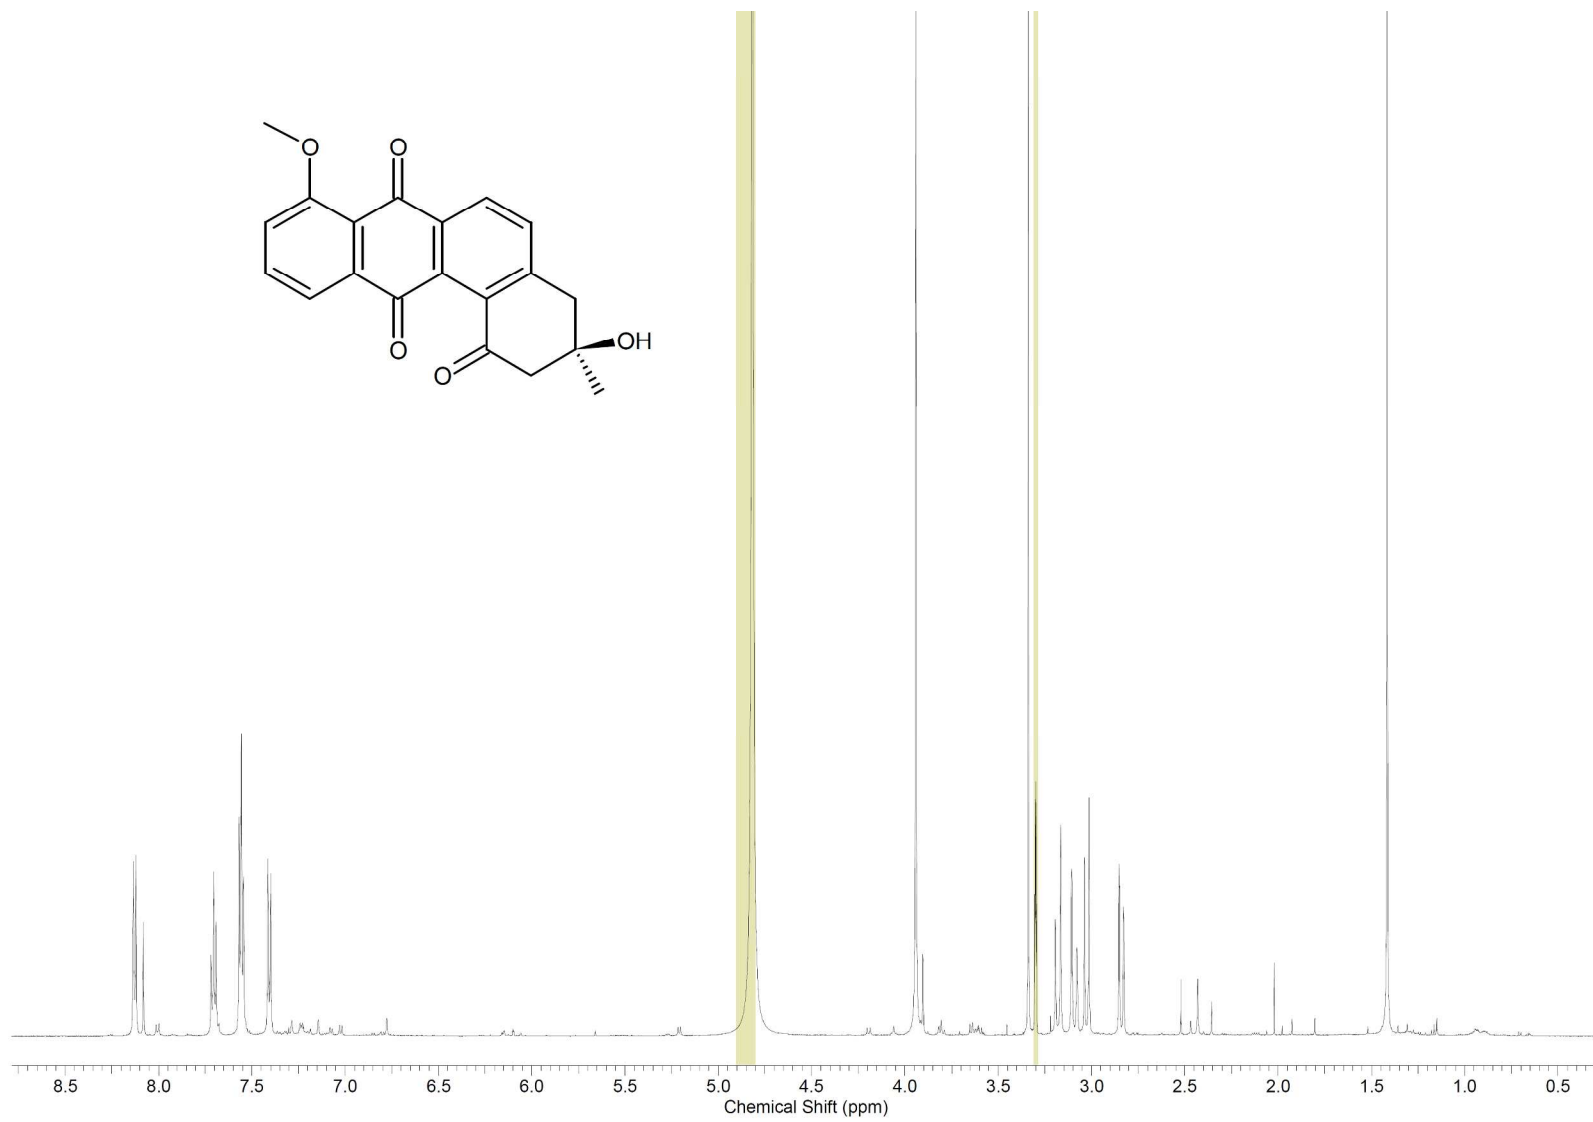

SI-20

$^{13}\text{C}$  NMR spectrum of **4** recorded in  $\text{CD}_3\text{OD}$  at 600 MHz

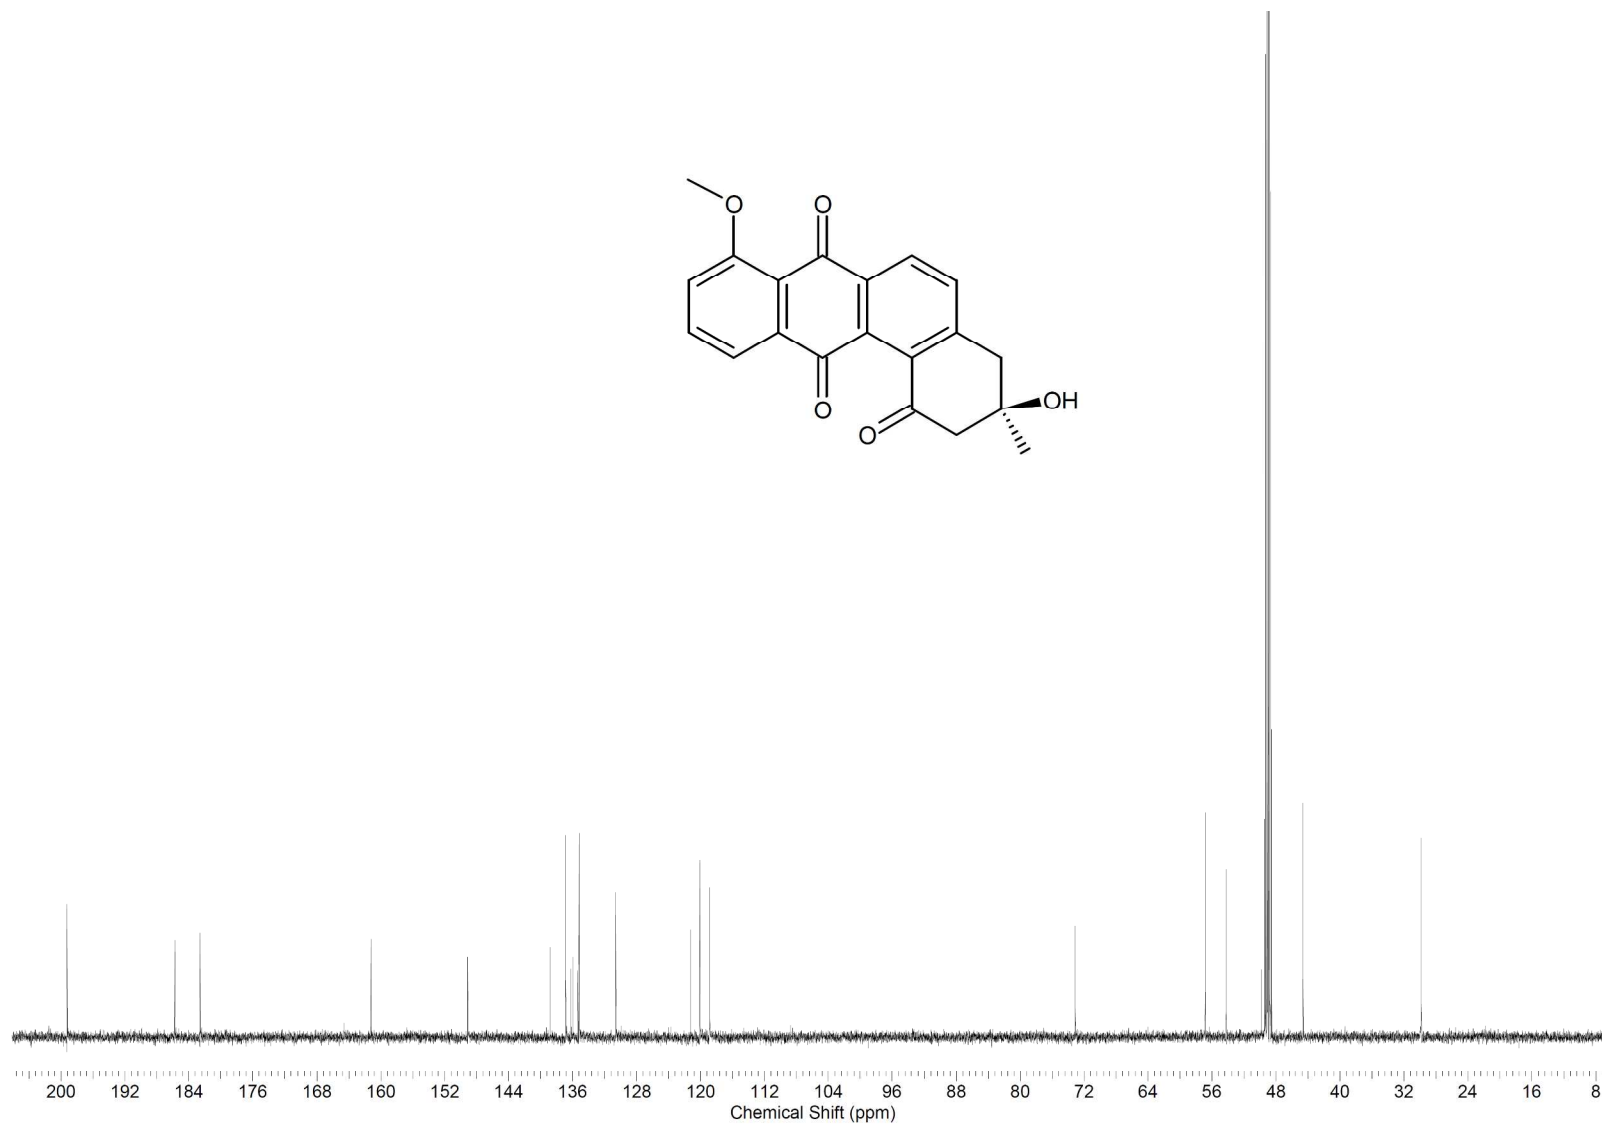

SI-21

$^1\text{H}$  NMR spectrum of **5** recorded in  $\text{CD}_2\text{Cl}_2$  at 600 MHz

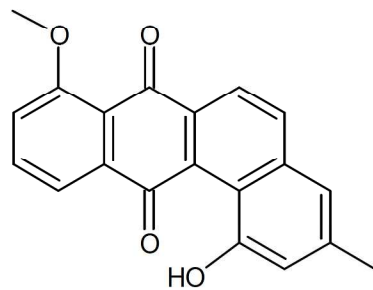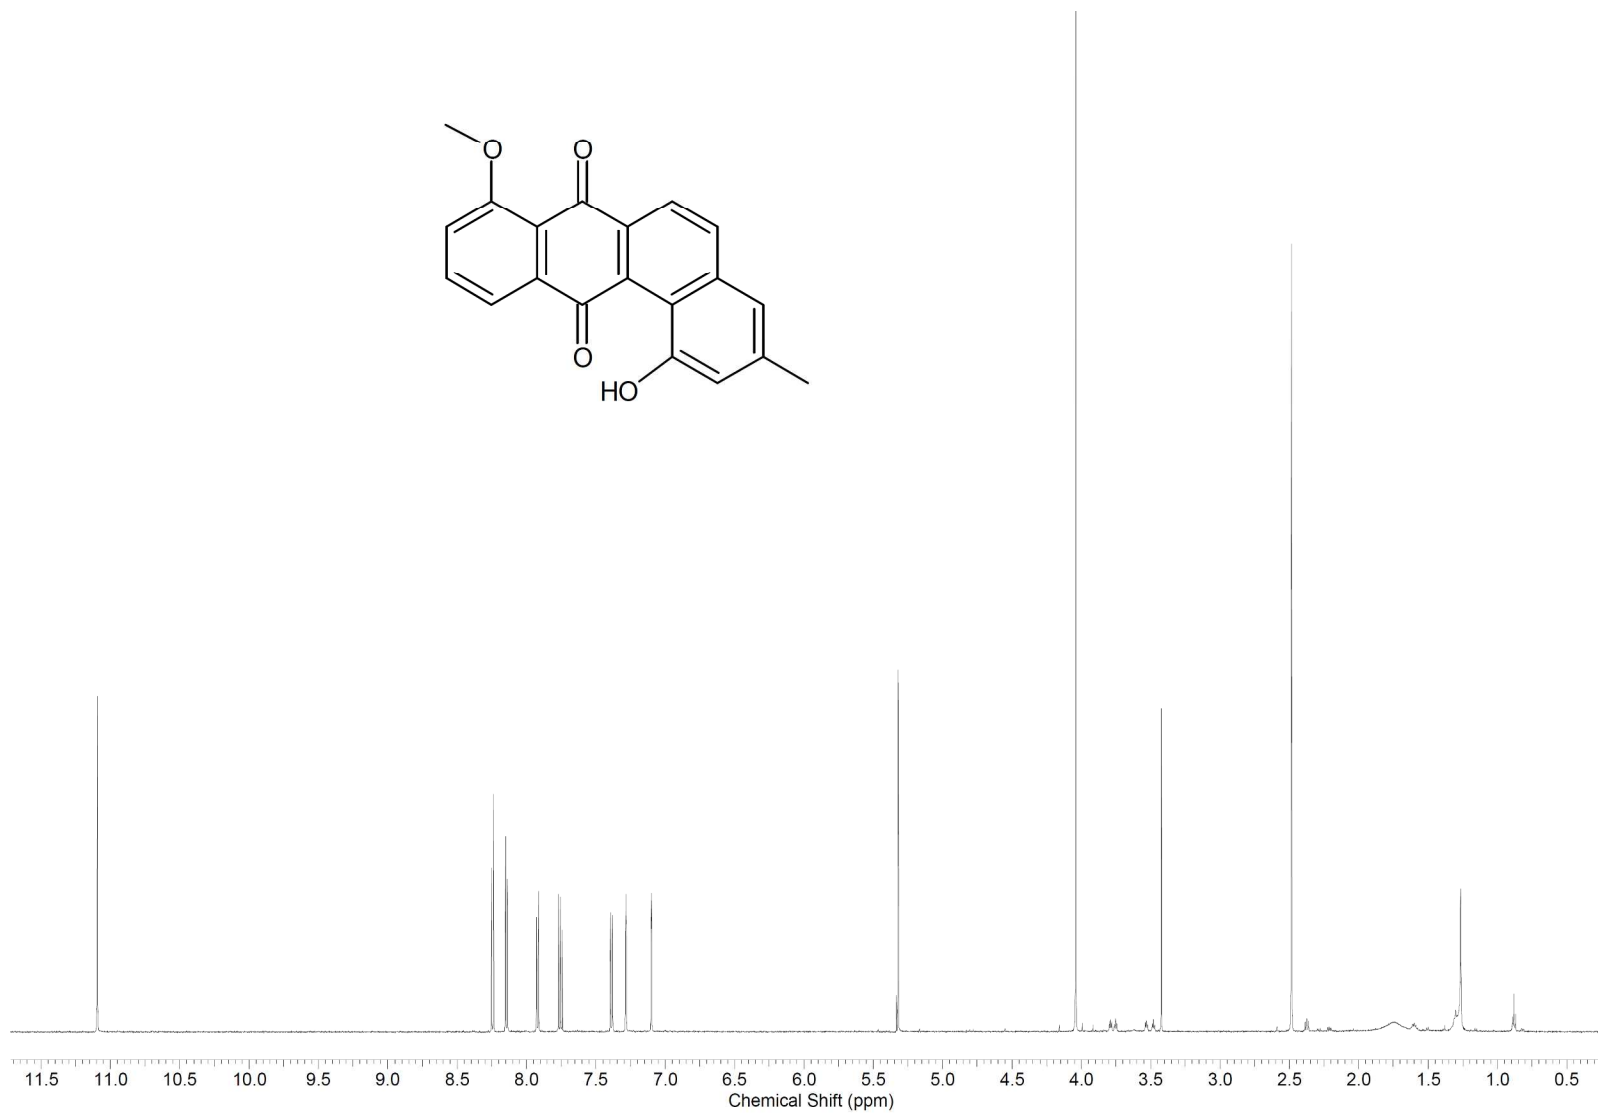

SI-22

$^{13}\text{C}$  NMR spectrum of **5** recorded in  $\text{CD}_2\text{Cl}_2$  at 600 MHz

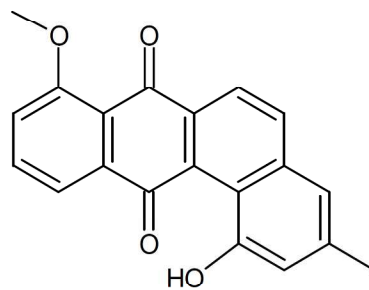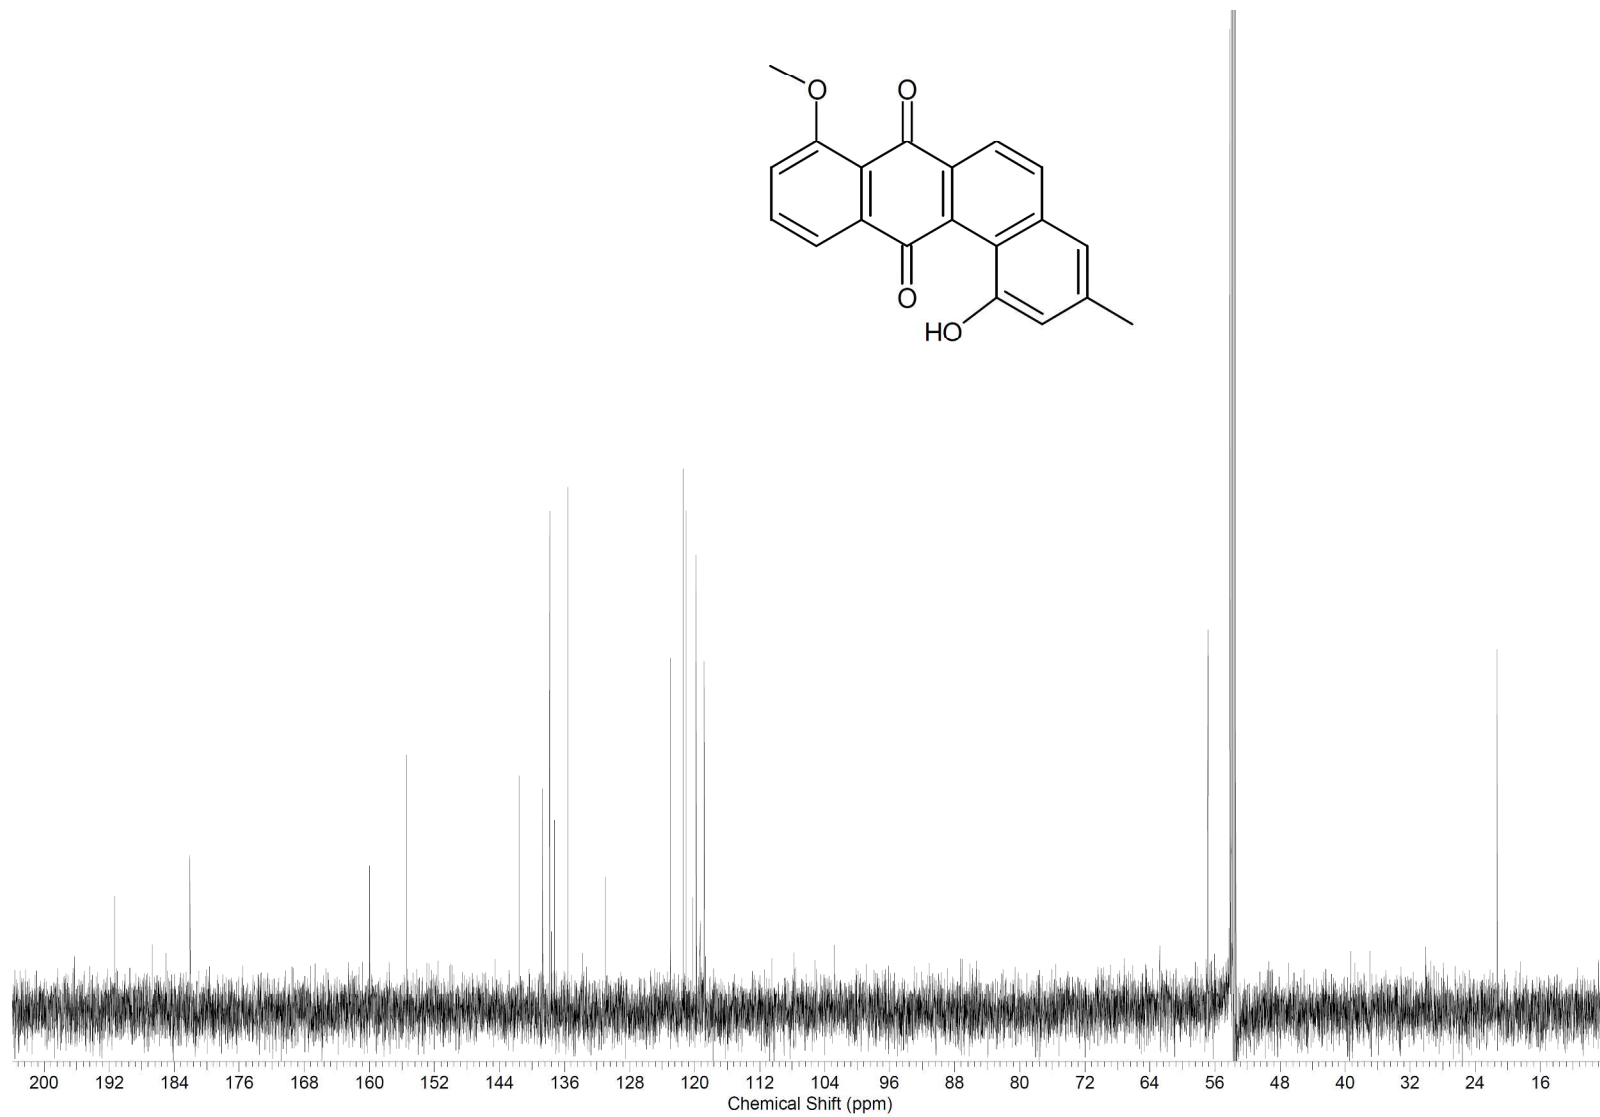

Supplement: np300380t_si_001.pdf [file np300380t_si_001.pdf]
